# Supplementary material for: Multicomponent reaction through cooperative trio catalysis incorporating enamine, Brønsted acid and metal Lewis acid catalysis: a concise route to access chromans
Source: Royal Society of Chemistry journal article supplement (doi:10.1039/c7ob00753a), 2017-01-01

**Multicomponent Reaction through Cooperative Trio Catalysis Incorporating Enamine,  
Brønsted Acid and Metal Lewis Acid Catalysis: A Concise Route to Access Chromans**

Chamini V. Karunaratne, Ryan G. Sarkisian, Jennifer Reeves, Yongming Deng, Kraig A.  
Wheeler, Hong Wang

**SUPPORTING INFORMATION**

**Contents**

|       |                                                     |     |
|-------|-----------------------------------------------------|-----|
| I.    | Supplementary Information .....                     | S1  |
| II.   | General Information.....                            | S2  |
| III.  | Substrate Scope.....                                | S2  |
| IV.   | Asymmetric Synthesis .....                          | S4  |
| V.    | NMR spectroscopic data.....                         | S6  |
| VI.   | HPLC Chromatography data.....                       | S11 |
| VII.  | <sup>1</sup> H and <sup>13</sup> C NMR Spectra..... | S14 |
| VIII. | X-Ray crystal structure of <b>4a</b> .....          | S32 |
| IX.   | IR Spectroscopy Data .....                          | S32 |

## II. General Information

Unless otherwise noted all commercial materials were used without further purification. Small-scale reactions were conducted in one-dram vials equipped with a magnetic stir bar, fitted with a threaded cap. All NMR spectra were recorded on Bruker and Varian 500 MHz ( $^1\text{H}$  NMR), 125 MHz ( $^{13}\text{C}$  NMR) spectrometer. Mass spectra were obtained on a Bruker Esquire-LC ion trap instrument with an electrospray ionization source (ESI) operated in either positive or negative mode with direct injection via a syringe pump injecting at 500  $\mu\text{l/hr}$ . HRMS was obtained on positive mode with a resolution of 100,000 on Thermo Fisher Scientific MALDI-LTQ-XL-Orbitrap instrument. IR spectra were taken using PerkinElmer FT-IR spectrometer. Enantiomeric excesses were determined by chiral HPLC analysis Chiralpak AD-H and Chiralcel OD-H and OJ-H in comparison with the authentic racemates. Routine monitoring of the reaction was performed on Silicycle silica gel 60 F254 silica gel plates (TLC). Flash column chromatography was carried out on Silicycle 60 silica gel (40-63  $\mu\text{m}$ ). Cyclohexanone and cyclopentanone were ACS reagent pure and dried with molecular sieves. All the solvents were dried on solvent purification system. All the other reagents were purchased from Acros or Aldrich and used directly without further treatment.

## III. Substrate Scope

**Table 1:** Substrate screening of salicylaldehyde with  $\text{Yb}(\text{OTf})_3$  and (+/-) HCPA

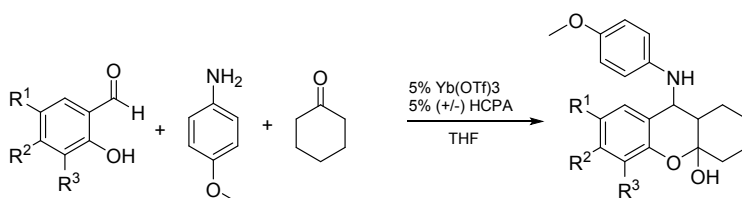

| Entry | R <sup>1</sup> | R <sup>2</sup> | R <sup>3</sup> | Name      | Time (h) | Yield | dr   |
|-------|----------------|----------------|----------------|-----------|----------|-------|------|
| 1     | H              | H              | H              | <b>4a</b> | 72       | 92    | 1:17 |
| 2     | Cl             | H              | H              | <b>4b</b> | 24       | 96    | 1:14 |
| 3     | Br             | H              | H              | <b>4c</b> | 24       | 91    | 1:13 |
| 4     | $\text{NO}_2$  | H              | H              | <b>4d</b> | 48       | 94    | 1:16 |
| 5     | Br             | H              | Br             | <b>4e</b> | 72       | 93    | 1:10 |
| 6     | Cl             | H              | Cl             | <b>4f</b> | 24       | 67    | 1:5  |
| 7     | H              | H              | $\text{OCH}_3$ | <b>4g</b> | 24       | 53    | 1:8  |
| 8     | H              | $\text{OCH}_3$ | H              | <b>4i</b> | 20       | 52    | 1:7  |
| 9     | H              | H              | $\text{CH}_3$  | <b>4s</b> | 36       | 53    | 1:10 |

Reactions were carried out in 1 Dram vials at room temperature using anhydrous THF, with 5% mmol Yb(OTf)<sub>3</sub> and 5% mmol (+/-)-HCPA. All transformations were performed on a 1.0 mmol scale. Reaction completion was monitored through TLC. Yields are isolated and dr was calculated from <sup>1</sup>H NMR spectroscopy.

**Table 2:** Substrate scope of the aryl amines with Yb(OTf)<sub>3</sub> and (+/-) HCPA

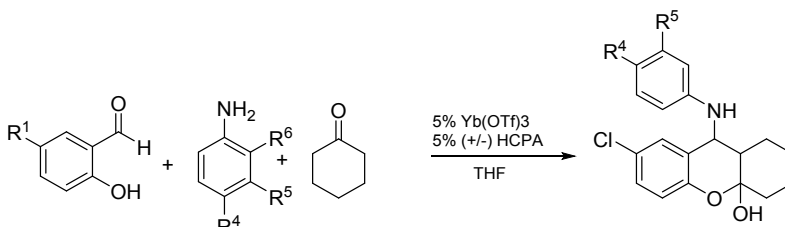

| Entry | R <sup>1</sup> | R <sup>4</sup>  | R <sup>5</sup> | R <sup>6</sup> | Compound  | Yield <sup>a</sup> | dr <sup>b</sup> |
|-------|----------------|-----------------|----------------|----------------|-----------|--------------------|-----------------|
| 1     | Cl             | H               | H              | Cl             | <b>4h</b> | 39                 | 1:4             |
| 2     | Cl             | H               | H              | H              | <b>4j</b> | 96                 | 1:6             |
| 3     | Cl             | H               | Cl             | H              | <b>4k</b> | 98                 | 1:2.5           |
| 4     | Cl             | Cl              | H              | H              | <b>4l</b> | 94                 | 1:2             |
| 5     | Cl             | Br              | H              | H              | <b>4m</b> | 95                 | 1:4             |
| 6     | Cl             | NO <sub>2</sub> | H              | H              | <b>4n</b> | -                  | -               |

Reactions were carried out in 1 Dram vials at room temperature using anhydrous THF for 20h. <sup>a</sup>Isolated yields. <sup>b</sup>Calculated using <sup>1</sup>H NMR spectroscopy.

**Table 3:** Substrate scope of the cyclic ketone with Yb(OTf)<sub>3</sub> and (+/-)-HCPA

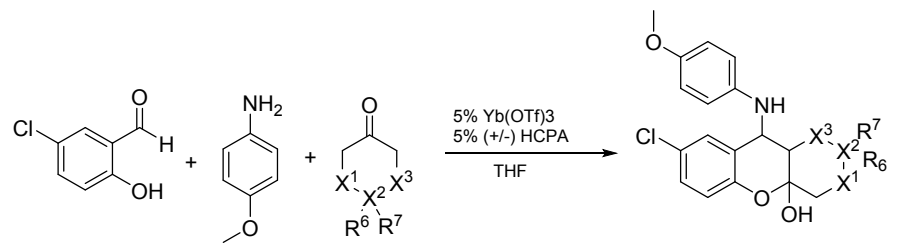

| Entry    | X <sup>1</sup>  | X <sup>2</sup>  | X <sup>3</sup>  | R <sup>6</sup>  | R <sup>7</sup>  | 4         | Time (h) | Yield <sup>a</sup> | dr <sup>b</sup> |
|----------|-----------------|-----------------|-----------------|-----------------|-----------------|-----------|----------|--------------------|-----------------|
| <b>1</b> | CH <sub>2</sub> | O               | CH <sub>2</sub> | -               | -               | <b>4o</b> | 18       | 91                 | 1:16            |
| <b>2</b> | CH <sub>2</sub> | S               | CH <sub>2</sub> | -               | -               | <b>4p</b> | 20       | 96                 | 1:100           |
| <b>3</b> | CH <sub>2</sub> | CH              | CH <sub>2</sub> | CH <sub>3</sub> | -               | <b>4q</b> | 18       | 92                 | 1:4             |
| <b>4</b> | O               | C               | O               | CH <sub>3</sub> | CH <sub>3</sub> | <b>4r</b> | 48       | 90                 | 1:4             |
| <b>5</b> | CH <sub>2</sub> | CH <sub>2</sub> | -               | -               | -               | -         | 72       | -                  | -               |
| <b>6</b> | CH <sub>2</sub> | -               | -               | -               | -               | -         | 72       | -                  | -               |
| <b>7</b> | CH <sub>2</sub> | N               | CH <sub>2</sub> | CH <sub>3</sub> | -               | -         | 72       | -                  | -               |

Reactions were carried out in 1 Dram vials at room temperature using anhydrous THF. <sup>a</sup>Isolated yields. <sup>b</sup>Calculated using <sup>1</sup>H NMR spectroscopy.

#### IV. Catalytic Asymmetric Synthesis

**Table 4:** Catalytic asymmetric version of the reaction

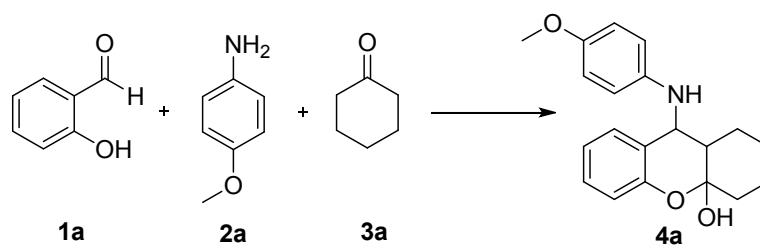

| Entry | Solvent | Metal (5%)           | A:B:C    | Brønsted Acid | Time | Yield <sup>a</sup> |
|-------|---------|----------------------|----------|---------------|------|--------------------|
| 1     | THF     | -                    | 1:1.2:25 | (R)HCPA       | 68h  | 34                 |
| 2     | Toluene | -                    | 1:1.2:25 | (R)HCPA       | 96h  | 32                 |
| 3     | Toluene | -                    | 1:1.2:25 | (R)TRIP       | 96h  | 28                 |
| 5     | THF     | Yb(OTf) <sub>3</sub> | 1:1.2:25 | (R)HCPA       | 12h  | 92 <sup>b</sup>    |

All reactions were set up in small reaction vials with a stir bar at room temperature using anhydrous solvents and 5% chiral phosphoric acid. All transformations were performed on a 1.0 mmol scale. Reaction completion was monitored through TLC. <sup>a</sup>Crude NMR Yields, <sup>b</sup>Isolated Yield.

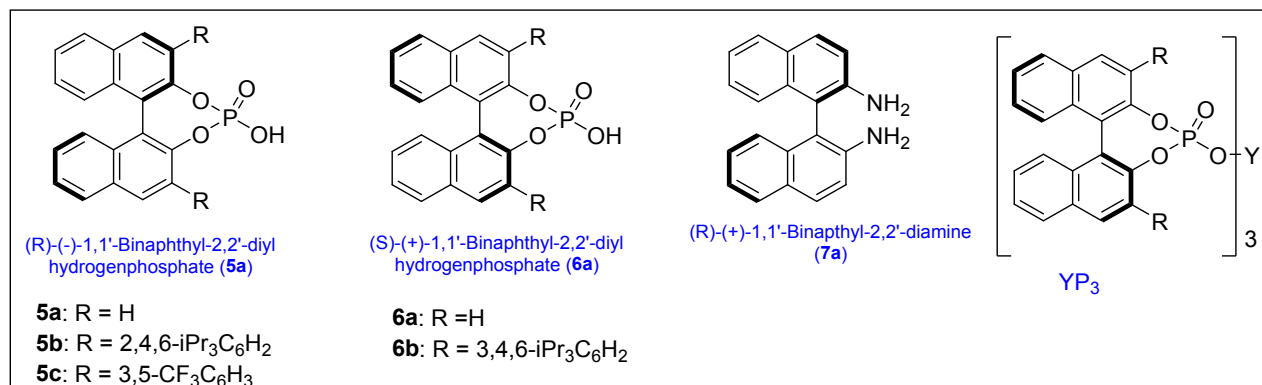

**Figure 1:** Chiral phosphoric acids and Chiral diamine used in the study

Based on the HPLC data, the ideal substrates for asymmetric exploration are 5-cholosalicylaldehyde, p-methoxyaniline, and the tetrahydrothiopyran-4-one. These three starting reagents produced the high yielding chroman **4p** which is separable on chiral HPLC.

**Table 5:** Enantiomeric excess and diastereomeric ratio of the three fused ring product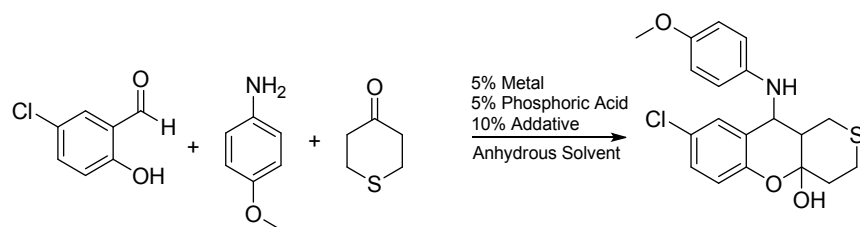

| Entry | Solvent       | Metal               | Phosphoric Acid | Additive                  | Reaction Time | dr <sup>i</sup> | ee <sup>i</sup> |
|-------|---------------|---------------------|-----------------|---------------------------|---------------|-----------------|-----------------|
| 1     | THF           | Y(OTf) <sub>3</sub> | <b>5b</b>       | -                         | 72h           | 3:1             | 15              |
| 2     | THF           | -                   | <b>5c</b>       | -                         | 72h           | 3:1             | 8               |
| 3     | Toluene       | Y(OTf) <sub>3</sub> | <b>5b</b>       | -                         | 72h           | 3:1             | 8               |
| 4     | Methanol      | Y(OTf) <sub>3</sub> | <b>5b</b>       | -                         | 84h           | 3:1             | Racemic         |
| 5     | DMF           | Y(OTf) <sub>3</sub> | <b>5b</b>       | -                         | 96h           | -               | -               |
| 6     | Acetonitrile  | Y(OTf) <sub>3</sub> | <b>5b</b>       | -                         | 84h           | 4:1             | Racemic         |
| 7     | Dioxane       | Y(OTf) <sub>3</sub> | <b>5b</b>       | -                         | 96h           | -               | -               |
| 8     | Diethyl Ether | Y(OTf) <sub>3</sub> | <b>5b</b>       | -                         | 48h           | 4:1             | 6               |
| 9     | Ethyl Acetate | Y(OTf) <sub>3</sub> | <b>5b</b>       | -                         | 72h           | 4:1             | Racemic         |
| 10    | DCM           | Y(OTf) <sub>3</sub> | (+/-)-HCPA      | <b>7a</b>                 | 48h           | 5:1             | 10              |
| 11    | DCM           | Y(OTf) <sub>3</sub> | <b>5a</b>       | <b>7a</b>                 | 48h           | 5:1             | 14              |
| 12    | DCM           | Y(OTf) <sub>3</sub> | <b>6a</b>       | <b>7a</b>                 | 48h           | 8:1             | 42              |
| 13    | DCM           | Y(OTf) <sub>3</sub> | <b>5b</b>       | <b>7a</b>                 | 48h           | 5:1             | 3               |
| 14    | DCM           | Y(OTf) <sub>3</sub> | <b>6a</b>       | <b>7a</b>                 | 6h            | 6:1             | 35              |
| 15    | DCM           | -                   | <b>6a</b>       | <b>7a</b>                 | 24h           | 7:1             | 46              |
| 16    | DMF           | -                   | <b>5c</b>       | <b>7a</b>                 | 24h           | 4:1             | 31              |
| 17    | DCM           | Y(OTf) <sub>3</sub> |                 | <b>7a, YP<sub>3</sub></b> | 96h           | 8:1             | 24              |

Reactions were set up in small reaction vials with stir bar at room temperature.

<sup>i</sup>Determined by HPLC analysis.

Reactions were setup using both the sequential and cooperative catalysis conditions. The sequential setup of the reaction was conducted through allowing the transition metal catalyst to activate the iminium ion intermediate formed between the salicylaldehyde and the aryl amine. Next the cyclic ketone and chiral catalytic aryl amine were added and allowed to react. Once this reaction came to completion the chiral phosphoric acid was added allowing for complete transformation to the three fused ring product (Entries 10-14). With this sequence the highest enantiomeric excess 42% was observed with the chiral phosphoric acid, **6a** (Table 6, entry 12). This reaction was then setup cooperatively by adding the transition metal catalyst, the chiral phosphoric acid and the chiral aryl amine allowing to complex first. After complexation the three

components were added. This transformation completed in 6 hours resulting 35% ee (Table 6, entry 14).

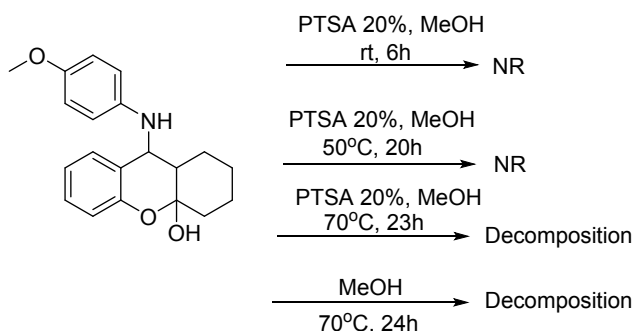

Scheme: 1 Attempted dehydration reactions of **4a**

## V. NMR Spectroscopic data

**4a:** Prepared according to the general procedure. Yield 92%, IR (neat) 2938, 2524, 1509, 1232  $\text{cm}^{-1}$ ;  $^1\text{H}$  NMR (500 MHz,  $\text{CD}_3\text{OD}$ )  $\delta$  7.51 (dt,  $J = 7.7, 1.4$  Hz, 1H), 7.16 – 7.10 (m, 1H), 6.89 (td,  $J = 7.5, 1.2$  Hz, 1H), 6.80 – 6.75 (m, 4H), 5.19 (d,  $J = 5.4$  Hz, 2H), 3.73 (s, 3H), 2.32 – 2.01 (m, 2H), 1.73 – 1.58 (m, 2H), 1.58 – 1.50 (m,  $J = 17.4, 6.3$  Hz, 2H), 1.24 – 1.10 (m, 1H), 0.91 (qd,  $J = 13.0, 3.6$  Hz, 1H);  $^{13}\text{C}$  NMR (126 MHz,  $\text{CD}_3\text{OD}$ )  $\delta$  152.2, 151.9, 142.2, 127.6, 126.4, 123.5, 120.2, 115.9, 98.0, 54.8, 38.8, 38.4, 24.2, 22.7, 21.6. MS (ESI)  $m/z$  calculated 325.2, observed 326.2 ( $\text{M}+\text{H}$ ) $^+$ . HRMS (MALDI)  $m/z$  calculated 325.1678, observed 326.1669.

**4b:** Prepared according to the general procedure. Yield 96%, IR (neat) 3383, 2934, 1511, 1478, 819  $\text{cm}^{-1}$ ;  $^1\text{H}$  NMR (500 MHz,  $\text{CDCl}_3$ )  $\delta$  7.57 (s, 1H), 7.13 (d,  $J = 6.8$  Hz, 1H), 6.83 (d,  $J = 8.8$  Hz, 2H), 6.74 (t,  $J = 8.8$  Hz, 3H), 5.22 (d,  $J = 4.7$  Hz, 1H), 3.77 (s, 3H), 2.58 (s, 1H), 2.24 (dd,  $J = 8.0, 4.9$  Hz, 1H), 2.03 (d,  $J = 10.0$  Hz, 1H), 1.76 – 1.42 (m, 3H), 1.17 (d,  $J = 12.9$  Hz, 1H), 0.96 – 0.74 (m, 2H);  $^{13}\text{C}$  NMR (126 MHz,  $\text{CDCl}_3$ )  $\delta$  152.6, 150.3, 128.3, 126.7, 125.9, 125.0, 117.9, 115.2, 114.6, 98.6, 55.9, 49.9, 49.7, 49.5, 48.2, 39.2, 38.1, 24.2, 22.8, 21.6. MS (ESI)  $m/z$  calculated 359.1, observed 382.1 ( $\text{M}+\text{Na}$ ) $^+$ . HRMS (MALDI)  $m/z$  calculated 359.1288, observed 359.1285.

**4c:** Prepared according to the general procedure. Yield 91%, IR (neat) 3394, 2932, 1512, 819  $\text{cm}^{-1}$ ;  $^1\text{H}$  NMR (500 MHz,  $\text{CDCl}_3$ )  $\delta$  7.74 (s, 1H), 7.30 (d,  $J = 8.5$  Hz, 1H), 6.84 (t,  $J = 11.3$  Hz, 2H), 6.74 (dd,  $J = 15.2, 8.5$  Hz, 3H), 5.26 (s, 1H), 3.77 (d,  $J = 24.2$  Hz, 3H), 2.32 – 2.18 (m, 1H), 2.05

(d,  $J = 11.2$  Hz, 1H), 1.90 – 1.46 (m, 5H), 1.28 – 1.13 (m, 1H), 0.96 – 0.82 (m, 1H);  $^{13}\text{C}$  NMR (126 MHz,  $\text{CDCl}_3$ )  $\delta$  152.4, 150.8, 140.7, 131.3, 129.7, 125.6, 118.4, 115.2, 114.7, 113.4, 99.1, 55.8, 48.2, 39.2, 37.7, 24.2, 22.8, 21.5. MS (ESI)  $m/z$  calculated 403.1, observed 426.1 ( $\text{M}+\text{Na}$ ) $^+$ . HRMS (MALDI)  $m/z$  calculated 403.0783, observed 403.0781.

**4d**: Prepared according to the general procedure. Yield 94%, IR (neat) 3388, 2916, 2849, 1511, 1238, 1025  $\text{cm}^{-1}$ ;  $^1\text{H}$  NMR (500 MHz, DMSO)  $\delta$  8.34 (d,  $J = 1.8$  Hz, 1H), 8.20 – 7.99 (m, 1H), 7.18 (s, 1H), 6.99 (d,  $J = 9.0$  Hz, 1H), 6.87 – 6.69 (m, 3H), 5.53 (d,  $J = 10.8$  Hz, 1H), 5.13 (dd,  $J = 10.3, 5.2$  Hz, 1H), 3.65 (s, 3H), 2.17 – 2.09 (m, 2H), 1.69 – 1.49 (m, 4H), 1.36 (dd,  $J = 25.9, 13.1$  Hz, 1H), 1.26 – 1.00 (m, 1H), 0.72–0.65 (m, 1H);  $^{13}\text{C}$  NMR (126 MHz, DMSO)  $\delta$  159.7, 152.5, 143.0, 141.9, 126.2, 125.4, 124.5, 118.4, 116.1, 115.4, 101.5, 56.5, 48.7, 39.4, 38.8, 32.0, 24.9, 23.7, 23.0. MS (ESI)  $m/z$  calculated 370.1, observed 393.2 ( $\text{M}+\text{Na}$ ) $^+$ . HRMS (MALDI)  $m/z$  calculated 370.1529, observed 370.1526.

**4e**: Prepared according to the general procedure. Yield 93%, IR (neat) 3388, 2933, 2860, 1703,  $\text{cm}^{-1}$ ;  $^1\text{H}$  NMR (500 MHz,  $\text{CD}_3\text{Cl}$ )  $\delta$  7.71 – 7.53 (m, 1H), 7.50 (s, 1H), 6.72 (d,  $J = 5.8$  Hz, 4H), 5.33 (d,  $J = 10.5$  Hz, 1H), 5.09 (s, 1H), 3.62 (s, 3H), 2.49 (s, 3H), 2.13 (d,  $J = 12.8$  Hz, 1H), 2.00 (d,  $J = 12.1$  Hz, 1H), 1.72 – 1.28 (m, 3H), 1.02 (m, 0.5H), 0.58 (m, 0.5H);  $^{13}\text{C}$  NMR (126 MHz,  $\text{CDCl}_3$ )  $\delta$  152.5, 147.8, 140.6, 134.1, 128.9, 126.9, 115.2, 114.7, 113.0, 111.4, 99.7, 55.6, 48.7, 42.0, 39.0, 37.7, 27.1, 25.0, 23.9, 22.8, 21.5. MS (ESI)  $m/z$  calculated 482.9, observed 481.7( $\text{M}-\text{H}$ ) $^-$ . HRMS (MALDI)  $m/z$  calculated 482.9868, observed 482.9860.

**4f**: Prepared according to the general procedure. Yield 67%, IR (neat) 3394, 2933, 1510, 1448, 815  $\text{cm}^{-1}$ ;  $^1\text{H}$  NMR (500 MHz,  $\text{CD}_3\text{OD}$ )  $\delta$  7.46 (dd,  $J = 2.5, 1.1$  Hz, 1H), 7.26 (dd,  $J = 2.6, 0.8$  Hz, 1H), 6.82 – 6.76 (m, 4H), 5.20 (d,  $J = 5.3$  Hz, 1H), 3.73 (s, 3H), 3.31 (s, 1H), 2.50 – 2.25 (m, 2H), 2.25 – 2.09 (m, 2H), 1.91 – 1.83 (m, 2H), 1.74 – 1.54 (m, 3H), 0.81 (ddd,  $J = 26.4, 13.1, 3.5$  Hz, 1H);  $^{13}\text{C}$  NMR (126 MHz,  $\text{CD}_3\text{OD}$ )  $\delta$  155.2, 147.0, 141.7, 127.6, 127.2, 125.2, 124.5, 121.6, 114.7, 114.4, 99.3, 54.8, 38.4, 37.9, 24.0, 22.6, 21.5. MS (ESI)  $m/z$  calculated 393.0, observed 394.0 ( $\text{M}+\text{H}$ ) $^+$ . HRMS (MALDI)  $m/z$  calculated 393.0898, observed 393.0889.

**4g**: Prepared according to the general procedure. Yield 53%, IR (neat) 3388, 2916, 2849, 1509, 1234  $\text{cm}^{-1}$ ;  $^1\text{H}$  NMR (500 MHz, DMSO)  $\delta$  8.34 (t,  $J = 9.5$  Hz, 1H), 8.13 – 8.05 (m, 1H), 7.19 (s, 1H), 7.00 (d,  $J = 9.0$  Hz, 1H), 6.85 – 6.73 (m, 4H), 5.54 (d,  $J = 10.8$  Hz, 1H), 5.14 (dd,  $J = 10.4,$

5.2 Hz, 1H), 3.66 (s, 3H), 2.19 – 2.03 (m,  $J = 35.6, 21.9$  Hz, 2H), 1.71 – 1.50 (m, 4H), 1.44 – 1.31 (m, 1H), 1.26 – 1.00 (m, 2H), 0.75 – 0.56 (m, 1H);  $^{13}\text{C}$  NMR (126 MHz, DMSO)  $\delta$  158.4, 151.2, 141.7, 140.6, 125.0, 124.1, 123.3, 117.2, 114.8, 114.1, 100.3, 55.3, 47.4, 38.1, 37.5, 23.7, 22.5, 21.7. MS (ESI)  $m/z$  calculated 355.2, observed 356.2 (M+H) $^+$ . HRMS (MALDI)  $m/z$  calculated 355.1784, observed 355.1657.

**4h:** Prepared according to the general procedure. Yield 39%, IR (neat) 3386, 2928, 2852, 1493, 818  $\text{cm}^{-1}$ ;  $^1\text{H}$  NMR (500 MHz,  $\text{CD}_3\text{OD}$ )  $\delta$  7.41 (dd,  $J = 2.5, 1.1$  Hz, 1H), 7.17 – 7.04 (m, 4H), 6.80 – 6.74 (m, 2H), 6.75 – 6.61 (m, 2H), 5.22 (d,  $J = 5.4$  Hz, 1H), 2.19 – 2.02 (m, 2H), 1.90 – 1.82 (m, 2H), 1.75 (ddd,  $J = 10.5, 4.8, 2.1$  Hz, 1H), 1.73 – 1.50 (m, 3H), 1.36 – 1.14 (m, 2H), 0.89 (qd,  $J = 13.1, 3.6$  Hz, 1H);  $^{13}\text{C}$  NMR (126 MHz,  $\text{CD}_3\text{OD}$ )  $\delta$  151.0, 146.8, 128.6, 127.6, 126.3, 125.1, 124.9, 121.0, 117.6, 113.9, 98.3, 41.2, 38.5, 38.1, 26.8, 24.1, 22.6, 21.7. MS (ESI)  $m/z$  calculated 393.1 observed 416.1 (M+Na) $^+$ . HRMS (MALDI)  $m/z$  calculated 393.0898 observed 393.0886.

**4i:** Prepared according to the general procedure. Yield 52%, IR (neat) 2921, 2850, 1615, 1510, 1249  $\text{cm}^{-1}$ ;  $^1\text{H}$  NMR (500 MHz,  $\text{CDCl}_3$ )  $\delta$  7.44 (dd,  $J = 12.6, 6.3$  Hz, 1H), 6.85 – 6.81 (m, 2H), 6.75 – 6.72 (m, 2H), 6.54 (dd,  $J = 8.6, 2.6$  Hz, 1H), 6.42 – 6.39 (m,  $J = 3.7$  Hz, 1H), 5.75 (dd,  $J = 6.1, 2.1$  Hz, 1H), 5.20 (d,  $J = 5.5$  Hz, 1H), 4.01 – 3.93 (m, 1H), 3.78 (s, 3H), 3.78 (s, 3H), 2.28 – 2.22 (m, 1H), 2.15 – 2.01 (m, 2H), 2.01-1.97 (m, 1H), 1.89 – 1.78 (m, 2H), 1.74 – 1.65 (m, 2H), 1.63 – 1.57 (m, 2H);  $^{13}\text{C}$  NMR (126 MHz,  $\text{CDCl}_3$ )  $\delta$  160.0, 152.6, 152.1, 141.4, 127.6, 115.1, 114.6, 114.5, 107.6, 101.6, 99.0, 67.4, 55.8, 55.3, 47.8, 39.4, 38.4, 29.5, 24.3, 23.8, 22.9, 21.7. MS (ESI)  $m/z$  calculated 355.2, observed 356.2 (M+H) $^+$ . HRMS (MALDI)  $m/z$  calculated 355.1784, observed 355.1775.

**4j:** Prepared according to the general procedure. Yield 96%, IR (neat) 3155, 1434, 1188, 743  $\text{cm}^{-1}$ ;  $^1\text{H}$  NMR (500 MHz, DMSO)  $\delta$  7.33 (d,  $J = 1.7$  Hz, 1H), 7.18 (dd,  $J = 8.6, 2.5$  Hz, 1H), 7.11 (dd,  $J = 15.9, 8.3$  Hz, 3H), 6.83 (d,  $J = 9.5$  Hz, 1H), 6.79 (d,  $J = 8.6$  Hz, 1H), 6.74 (d,  $J = 7.9$  Hz, 2H), 6.57 (t,  $J = 7.2$  Hz, 1H), 5.85 (d,  $J = 10.3$  Hz, 1H), 5.13 (dd,  $J = 10.0, 5.3$  Hz, 1H), 2.24 (t,  $J = 6.7$  Hz, 1H), 2.09 – 1.99 (m, 2H), 1.78 – 1.70 (m,  $J = 12.6, 6.3$  Hz, 1H), 1.70 – 1.29 (m, 4H), 1.19 – 1.02 (m, 1H);  $^{13}\text{C}$  NMR (126 MHz, DMSO)  $\delta$  151.0, 148.0, 129.2, 127.7, 126.4, 125.5, 123.5, 118.2, 116.3, 112.6, 98.7, 46.7, 41.3, 38.4, 37.9, 26.5, 24.3, 23.9, 22.6, 22.0. MS (ESI)



m/z calculated 329.1, observed 328.0 (M-H)<sup>-</sup>. HRMS (MALDI) m/z calculated 329.1183, observed 329.1171.

**4k:** Prepared according to the general procedure. Yield 98%, IR (neat) 3369, 2932, 2857, 1493, 812 cm<sup>-1</sup>; <sup>1</sup>H NMR (500 MHz, CD<sub>3</sub>OD) \*δ 7.42 (d, *J* = 1.5 Hz, 1H), 7.30 – 7.20 (m, 1H), 7.17 – 7.08 (m, 2H), 7.08 – 7.02 (m, 2H), 6.76 (t, *J* = 6.0 Hz, 2H), 6.74 – 6.68 (m, 1H), 6.62 (t, *J* = 10.7 Hz, 1H), 5.22 (d, *J* = 5.4 Hz, 1H), 4.55 – 4.39 (m, 1H), 2.19 – 1.99 (m, 2H), 1.72 – 1.51 (m, *J* = 27.3, 18.7, 14.4, 6.9 Hz, 3H), 1.37 – 1.12 (m, 3H), 0.95 – 0.80 (m, 1H); <sup>13</sup>C NMR (126 MHz, CD<sub>3</sub>OD) δ 151.0, 146.8, 128.7, 127.6, 127.5, 126.3, 125.1, 124.9, 121.0, 117.7, 113.9, 98.2, 50.3, 38.5, 38.2, 26.3, 25.1, 24.2, 22.6, 21.7. MS (ESI) m/z calculated 363.1, observed 361.8 (M-H)<sup>-</sup>. HRMS (MALDI) m/z calculated 363.0793, observed 363.0783.

\* The spectra exist as a set of diastereomers in a ratio of 1: 2.5. The reported data values are only for the major diastereomer.

**4l:** Prepared according to the general procedure. Yield 94%, IR (neat) 3387, 2930, 1594, 1476, 933, cm<sup>-1</sup>; <sup>1</sup>H NMR (500 MHz, CD<sub>3</sub>OD) \*δ 7.40 (d, *J* = 1.5 Hz, 1H), 7.20 (d, *J* = 1.8 Hz, 1H), 7.17 – 7.09 (m, 1H), 7.10 – 7.01 (m, 2H), 6.84 – 6.75 (m, 1H), 6.75 – 6.69 (m, 1H), 6.69 – 6.63 (m, 1H), 6.64 – 6.53 (m, 2H), 5.19 (t, *J* = 29.0 Hz, 1H), 4.51 (d, *J* = 11.4 Hz, 1H), 2.17 (dt, *J* = 4.6, 3.6 Hz, 1H), 2.12 – 2.00 (m, 1H), 1.98 – 1.80 (m, 1H), 1.73 – 1.52 (m, 3H), 1.38 – 1.13 (m, 2H), 0.96 – 0.82 (m, 1H); <sup>13</sup>C NMR (126 MHz, CD<sub>3</sub>OD) δ 151.1, 149.5, 134.7, 130.1, 127.6, 126.4, 125.1, 124.8, 118.0, 117.7, 116.3, 115.7, 112.2, 111.0, 98.5, 98.4, 50.0, 38.6, 38.1, 37.2, 26.3, 25.1, 24.1, 22.6, 21.8. MS (ESI) m/z calculated 363.1, observed 386.0 (M+Na)<sup>+</sup>. HRMS (MALDI) m/z calculated 363.0793, observed 363.0784.

\* The spectra exist as a set of diastereomers in a ratio of 1: 2.5. The reported data values are only for the major diastereomer.

**4m:** Prepared according to the general procedure. Yield 95%, IR (neat) 3258, 2932, 1476, 1234, 813 cm<sup>-1</sup>; <sup>1</sup>H NMR (500 MHz, DMSO) δ 7.33 (d, *J* = 1.7 Hz, 1H), 7.25 (d, *J* = 8.8 Hz, 1H), 7.22 – 7.17 (m, 1H), 7.17 – 7.09 (m, 1H), 6.85 – 6.75 (m, 2H), 6.72 (t, *J* = 9.4 Hz, 2H), 6.10 (d, *J* = 10.1 Hz, 1H), 5.13 (dd, *J* = 10.0, 5.4 Hz, 1H), 2.13 – 2.01 (m, 2H), 1.86 – 1.71 (m, 1H), 1.71 – 1.46 (m, 4H), 1.38 (ddd, *J* = 17.4, 16.0, 10.8 Hz, 1H); <sup>13</sup>C NMR (126 MHz, DMSO) δ 151.6, 147.9, 132.1, 128.3, 126.9, 125.5, 124.3, 118.5, 114.9, 107.2, 98.9, 60.2, 47.4, 38.8, 38.3, 24.3,

23.1, 22.5. MS (ESI)  $m/z$  calculated 407.0, observed 388.0 (M-H<sub>2</sub>O)<sup>+</sup>. HRMS (MALDI)  $m/z$  calculated 407.0288, observed 407.0278.

**4o**: Prepared according to the general procedure. Yield 91%, IR (neat) 3370, 1506, 1230, 932 cm<sup>-1</sup>; <sup>1</sup>H NMR (500 MHz, DMSO)  $\delta$  7.39 (d,  $J$  = 1.2 Hz, 1H), 7.24 – 7.19 (m, 1H), 6.85 (d,  $J$  = 8.7 Hz, 1H), 6.75 (dd,  $J$  = 27.3, 8.8 Hz, 4H), 5.44 (d,  $J$  = 10.6 Hz, 1H), 5.07 (dd,  $J$  = 10.3, 5.7 Hz, 1H), 3.90 – 3.70 (m, 1H), 3.66 (s, 3H), 2.90 (t,  $J$  = 11.8 Hz, 1H), 2.49 (s, 1H), 2.38 – 2.23 (m, 1H), 2.05 – 1.88 (m, 1H), 1.74 (td,  $J$  = 13.0, 5.1 Hz, 1H); <sup>13</sup>C NMR (126 MHz, DMSO)  $\delta$  38.4, 38.4, 45.7, 55.3, 64.6, 96.5, 114.2, 114.9, 118.3, 124.3, 125.2, 126.3, 128.1, 141.8, 150.9, 151.3. MS (ESI)  $m/z$  calculated 361.1, observed 384.1 (M+Na)<sup>+</sup>. HRMS (MALDI)  $m/z$  calculated 361.1081, observed 361.1074.

**4p**: Prepared according to the general procedure. Yield 96%, IR (neat) 3370, 2931, 2858, 1506, 1234 cm<sup>-1</sup>; <sup>1</sup>H NMR (500 MHz, DMSO)  $\delta$  7.43 – 7.38 (m, 1H), 7.21 (dd,  $J$  = 8.7, 2.5 Hz, 1H), 7.05 (s, 1H), 6.83 (d,  $J$  = 8.7 Hz, 1H), 6.78 (d,  $J$  = 8.8 Hz, 2H), 6.72 (d,  $J$  = 8.8 Hz, 2H), 5.59 (d,  $J$  = 10.7 Hz, 1H), 5.18 (dd,  $J$  = 10.5, 5.2 Hz, 1H), 3.65 (s, 3H), 2.73 (t,  $J$  = 12.3 Hz, 1H), 2.55 – 2.46 (m,  $J$  = 11.2 Hz, 3H), 2.37 (dd,  $J$  = 12.0, 9.2 Hz, 2H), 2.30 – 2.20 (m, 1H), 2.07 (t,  $J$  = 13.0 Hz, 1H), 1.76 (td,  $J$  = 13.3, 3.6 Hz, 1H), 1.76 (td,  $J$  = 13.3, 3.6 Hz, 1H); <sup>13</sup>C NMR (126 MHz, DMSO)  $\delta$  24.6, 24.9, 39.9, 47.7, 55.3, 96.4, 114.1, 114.9, 118.3, 124.4, 125.5, 126.4, 128.0, 141.6, 150.5, 151.2. MS (ESI)  $m/z$  calculated 377.0, observed 378.0 (M+H)<sup>+</sup>. HRMS (MALDI)  $m/z$  calculated 377.0852, observed 377.0672.

**4q**: Prepared according to the general procedure. Yield 92%, IR (neat) 2929, 1506, 1228, 818 cm<sup>-1</sup>; <sup>1</sup>H NMR (500 MHz, DMSO)  $\delta$  7.39 (d,  $J$  = 1.9 Hz, 1H), 7.17 (dd,  $J$  = 8.6, 2.5 Hz, 1H), 6.86 – 6.65 (m, 5H), 5.40 (d,  $J$  = 10.7 Hz, 1H), 5.06 (dd,  $J$  = 10.6, 5.3 Hz, 1H), 3.66 (s, 3H), 2.06 (d,  $J$  = 12.8 Hz, 1H), 2.04 – 1.97 (m, 1H), 1.57 (dd,  $J$  = 27.2, 13.6 Hz, 1H), 1.47 (td,  $J$  = 13.1, 3.4 Hz, 1H), 1.37 (dd,  $J$  = 25.8, 13.0 Hz, 1H), 1.14 – 1.02 (m, 1H), 0.76 – 0.65 (m, 1H); <sup>13</sup>C NMR (126 MHz, DMSO)  $\delta$  151.6, 151.4, 142.5, 128.1, 126.9, 126.3, 124.2, 118.4, 115.3, 114.3, 99.0, 55.7, 47.9, 38.8, 38.4, 24.4, 23.1, 22.3. MS (ESI)  $m/z$  calculated 373.1, observed 374.1 (M+H)<sup>+</sup>. HRMS (MALDI)  $m/z$  calculated 373.1445, observed 373.1438.

**4r**: Prepared according to the general procedure. Yield 90%, IR (neat) 3370, 1507, 1229, 814 cm<sup>-1</sup>; <sup>1</sup>H NMR (500 MHz, CDCl<sub>3</sub>)  $\delta$  7.34 – 7.20 (m, 2H), 7.01 (d,  $J$  = 8.5 Hz, 1H), 6.91 (d,  $J$  = 8.3

Hz, 2H), 6.88 – 6.77 (m, 3H), 4.42 (s, 1H), 4.31 (s, 1H), 3.91 (s, 2H), 3.82 (s, 3H), 1.57 (s, 3H), 1.40 (s, 3H);  $^{13}\text{C}$  NMR (126 MHz,  $\text{CDCl}_3$ )  $\delta$  154.7, 150.1, 138.6, 130.0, 129.7, 126.2, 120.9, 119.4, 117.4, 116.5, 115.1, 115.0, 99.6, 90.9, 66.4, 65.5, 55.7, 53.6, 28.8, 18.5. MS (ESI)  $m/z$  calculated 391.1, observed 414.1 ( $\text{M}+\text{Na}$ ) $^+$ . HRMS (MALDI)  $m/z$  calculated 391.1187, observed 391.1180.

**4s**: Prepared according to the general procedure. Yield 53%, IR (neat) 3306, 2939, 1615, 1506, 1247  $\text{cm}^{-1}$ ;  $^1\text{H}$  NMR (400 MHz,  $\text{CDCl}_3$ )  $\delta$  8.60 (s, 1H), 7.34 – 7.19 (m, 3H), 6.98 – 6.91 (m, 2H), 6.84 (dd,  $J = 9.4, 5.6$  Hz, 1H), 5.70 (dd,  $J = 5.9, 2.0$  Hz, 1H), 4.15 – 4.07 (m, 1H), 4.07 – 4.00 (m, 1H), 3.83 (s, 3H), 2.32 (s, 3H), 2.12 – 1.94 (m, 2H), 1.93 – 1.66 (m, 4H), 1.64 – 1.49 (m, 2H), 1.49 – 1.39 (m, 1H);  $^{13}\text{C}$  NMR (101 MHz,  $\text{CDCl}_3$ )  $\delta$  160.6, 159.3, 133.7, 129.6, 126.1, 122.2, 118.5, 114.5, 106.1, 67.6, 55.5, 30.1, 29.5, 28.8, 25.4, 23.5, 22.6, 22.4, 15.5. HRMS (MALDI)  $m/z$  calculated 339.1834, observed 339.1793.

## VI. HPLC Chromatography Data

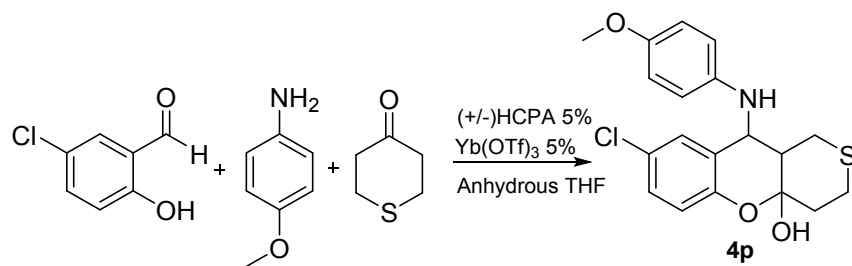

Racemic phosphoric acid, (+/-) HCPA, (0.05mmol, 17.9 mg) and  $\text{Yb}(\text{OTf})_3$  (0.05mmol, 31.5 mg) were mixed in anhydrous THF at room temperature for one hour. Next, 5-chlorosalicylaldehyde (1.0 mmol, 122.8 mg), p-methoxyaniline (1.2 mmol, 148.7 mg), and tetrahydrothiopyran-4-one (2.5 mmol, 303.2 mg) were added into the solution. After 8 h the reaction was separated using preparative TLC. Enantiomeric excess was determined by HPLC with a Chiralcel AD-H column (95:5) hexane/2-propanol, 0.5 mL/min, 254 nm, dr: 4:1, ee: racemic.

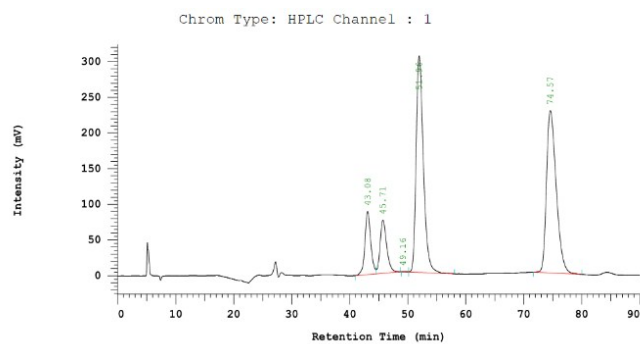

Processing Method: ADH-95Hexane5IPA-0.6-254  
 Column Type: AD-H Method Developer:  
 Method Description:

Chrom Type: HPLC Channel : 1

Peak Quantitation: AREA  
 Calculation Method: AREA%

| No. | RT    | Area     | Area % |
|-----|-------|----------|--------|
| 1   | 43.08 | 6070733  | 9.474  |
| 2   | 45.71 | 5808772  | 9.066  |
| 3   | 49.16 | 14647    | 0.023  |
| 4   | 51.96 | 25999424 | 40.576 |
| 5   | 74.57 | 26181912 | 40.861 |

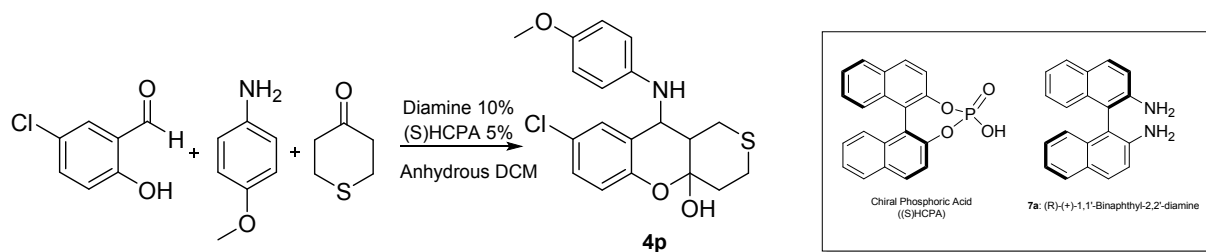

Chiral diamine, (R)-(+)-1,1'-Binaphthyl-2,2'-diamine, and (S)-HCPA (0.005 mmol, 1.8 mg) were dissolved in anhydrous methylene dichloride at room temperature and stirred for two hours. Next, 5-chlorosalicylaldehyde (0.1 mmol, 15.6 mg), p-methoxyaniline (0.1 mmol, 12.3 mg), and tetrahydrothiopyran-4-one (0.25 mmol, 29.0 mg) were mixed into the solution. After 24 h the product was separated using preparative TLC. Enantiomeric excess was determined by HPLC with a Chiralcel hexane/2-nm, dr: 6:1, ee: 46%.

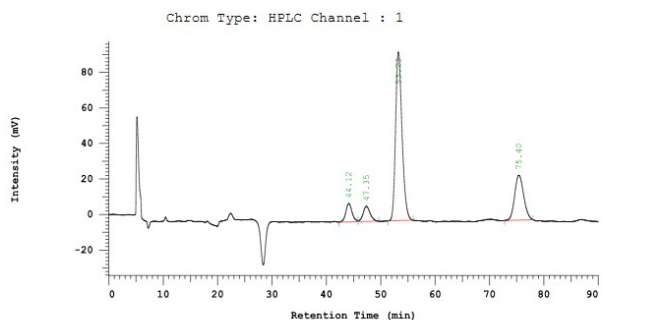

Processing Method: ADH-95Hexane5IPA-0.6-254  
 Column Type: AD-H Method Developer:  
 Method Description:

Chrom Type: HPLC Channel : 1

Peak Quantitation: AREA  
 Calculation Method: AREA%

| No. | RT    | Area     | Area %  |
|-----|-------|----------|---------|
| 1   | 44.12 | 820826   | 6.728   |
| 2   | 47.35 | 764233   | 6.264   |
| 3   | 53.23 | 7736601  | 63.415  |
| 4   | 75.40 | 2878350  | 23.593  |
|     |       | 12200010 | 100.000 |

## VII. $^1\text{H}$ and $^{13}\text{C}$ NMR Spectra

CVK-3-31 in CD<sub>3</sub>OD

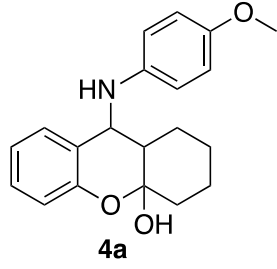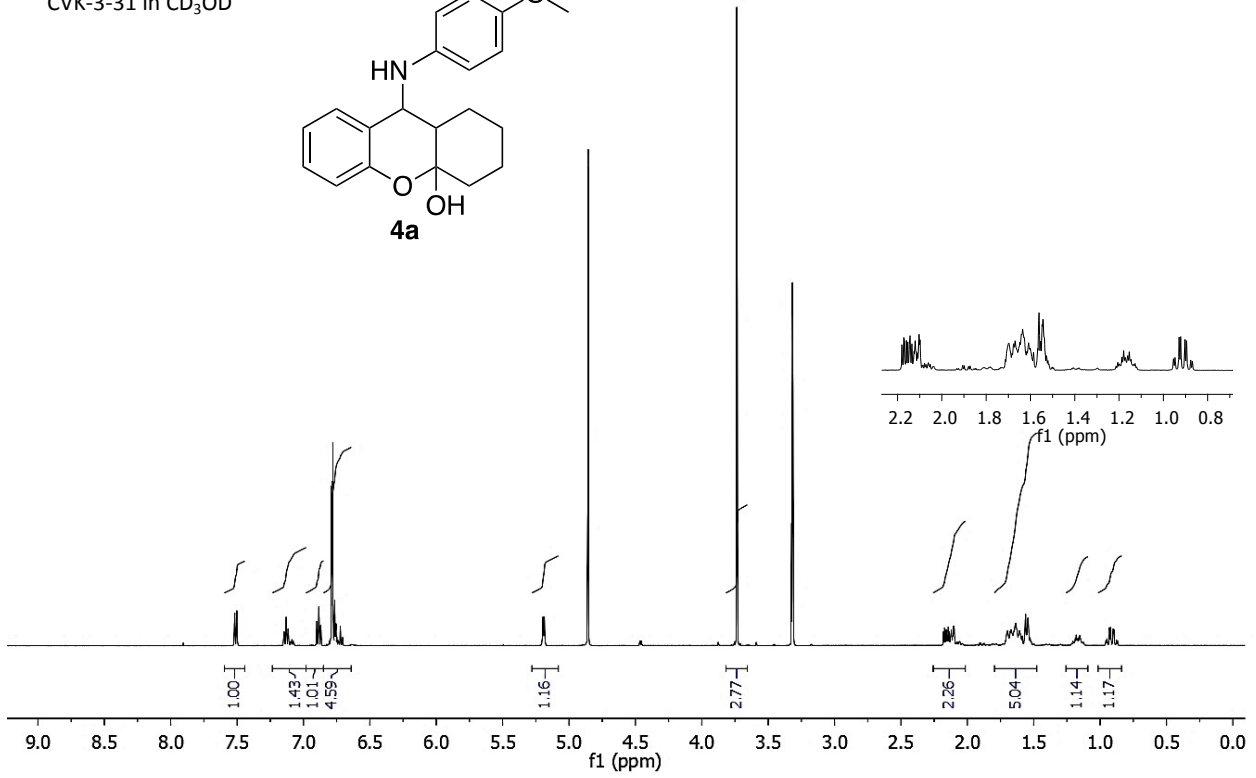

CARBON\_01  
CVK-3-31 in CD<sub>3</sub>OD

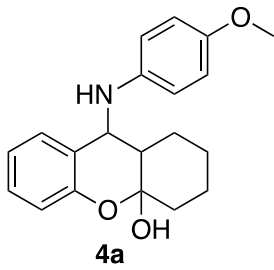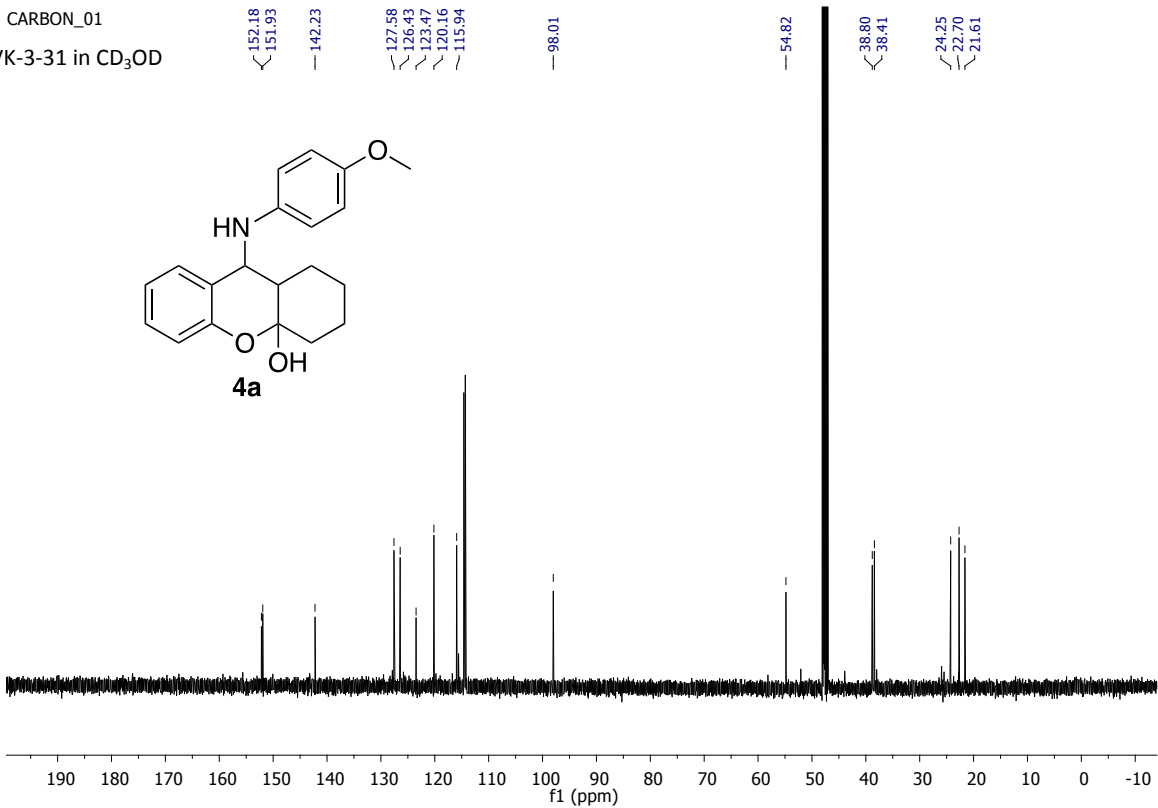

RS-1-185 in CD

Cl

RS-1-185  
RS-1-185 H

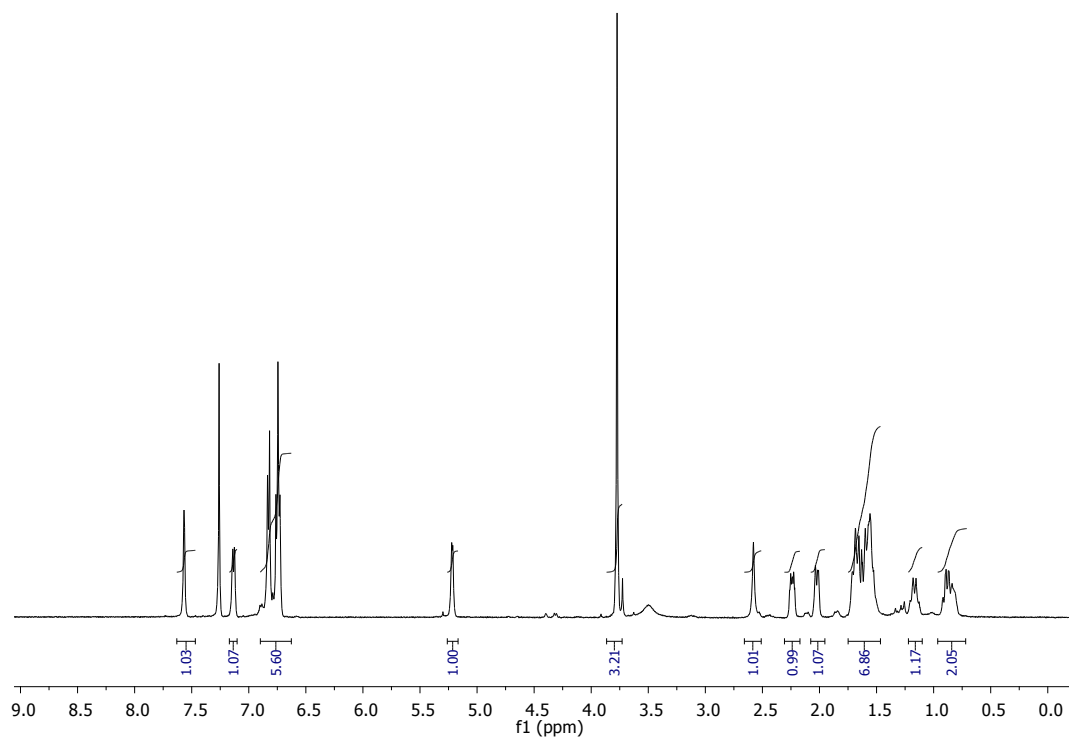

RGS-1-1984bJAR  
RGS-1-1984bJAR More concentrated  
RS-1-85 in CDCl<sub>3</sub>

128.32 126.67 126.02 124.97 118.00 115.48 114.65 98.62 55.87 49.86 49.69 48.52 48.27 39.20 38.13 24.23 22.36 21.93

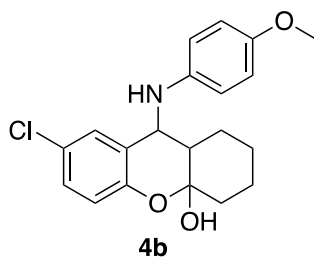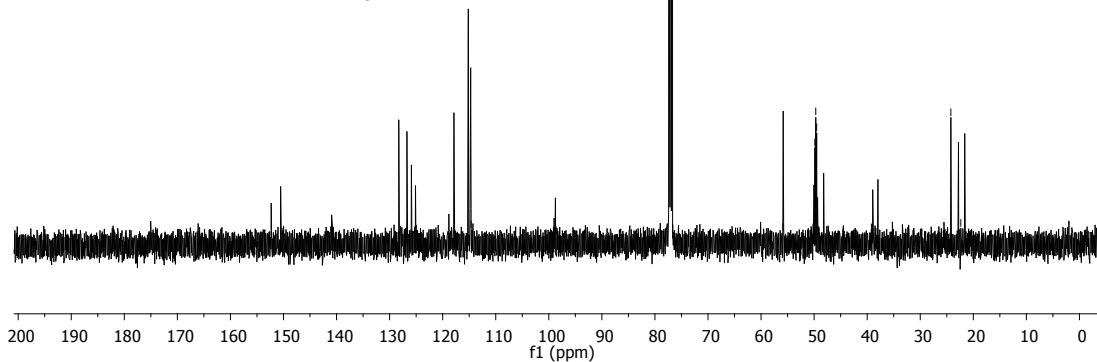

RGS-4C in CDCl<sub>3</sub>

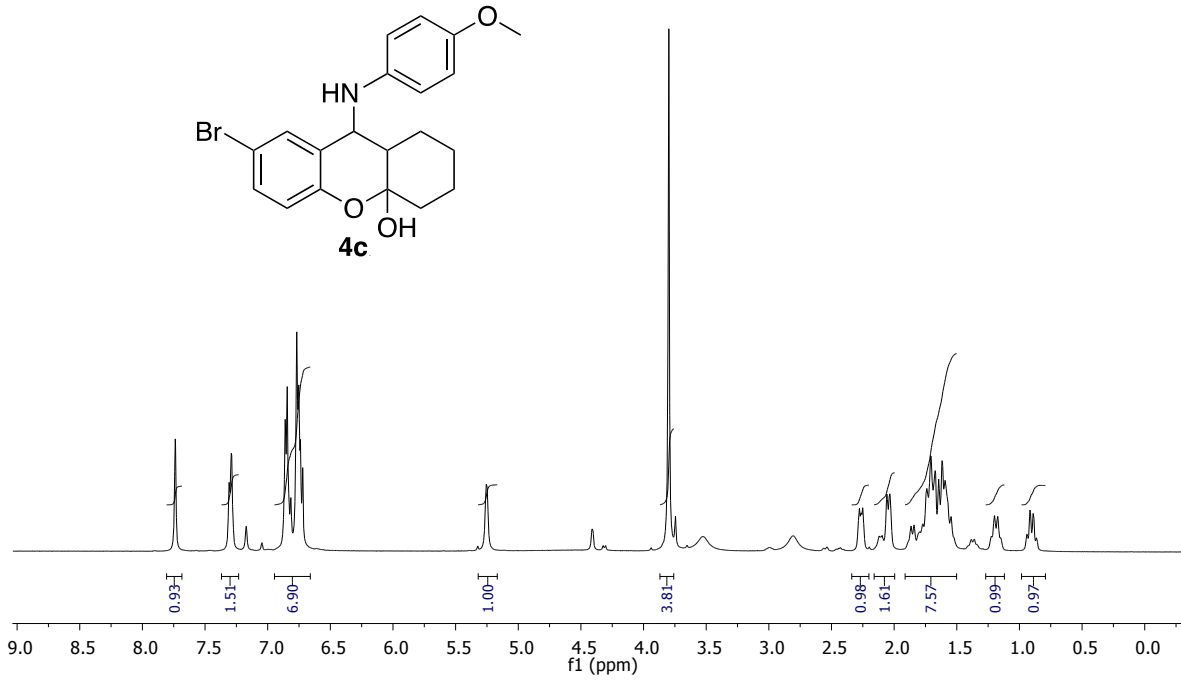

RGS-4C in CDCl<sub>3</sub>

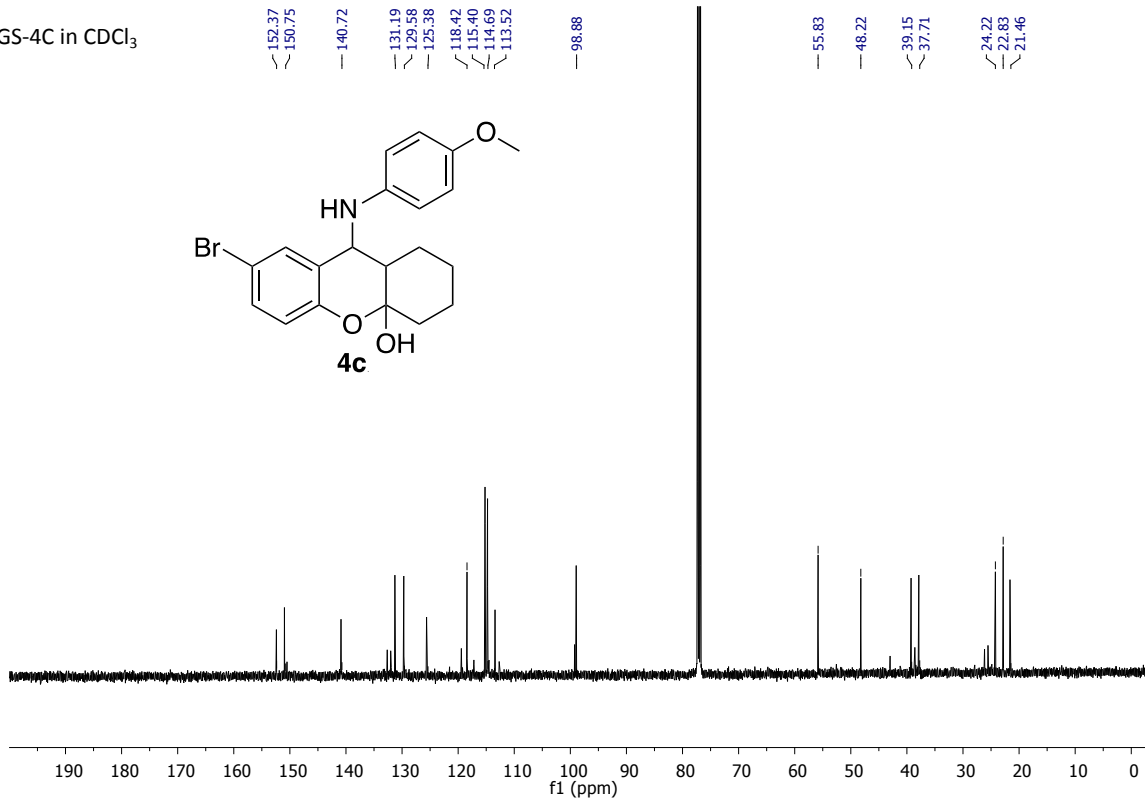



PROTON\_01  
CVK-3-133 in DMSO

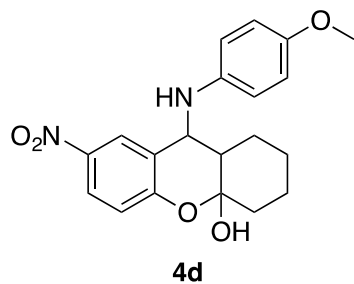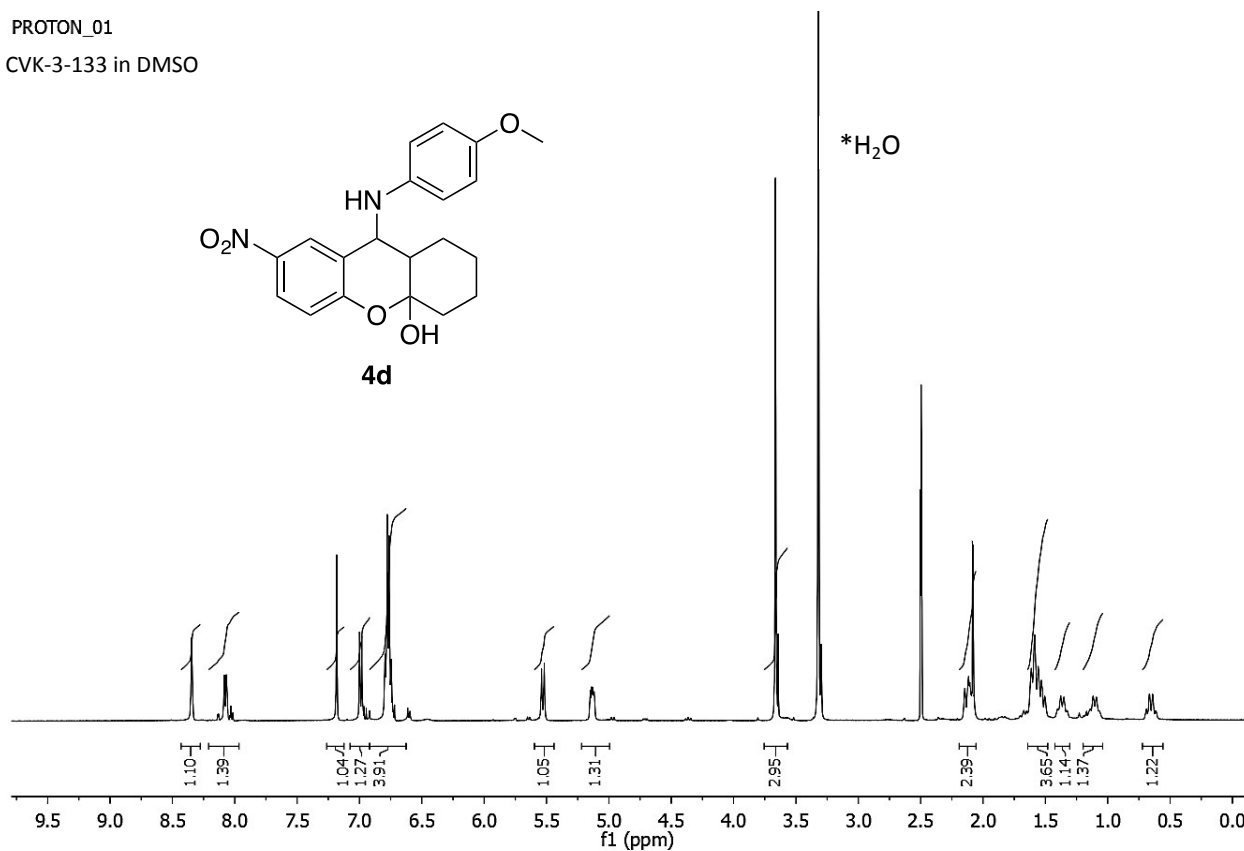

CARBON\_01  
CVK-3-133 in DMSO

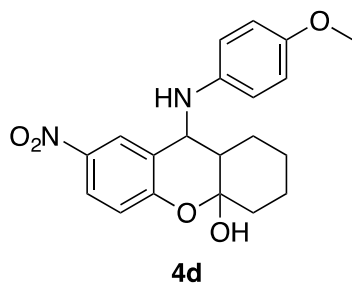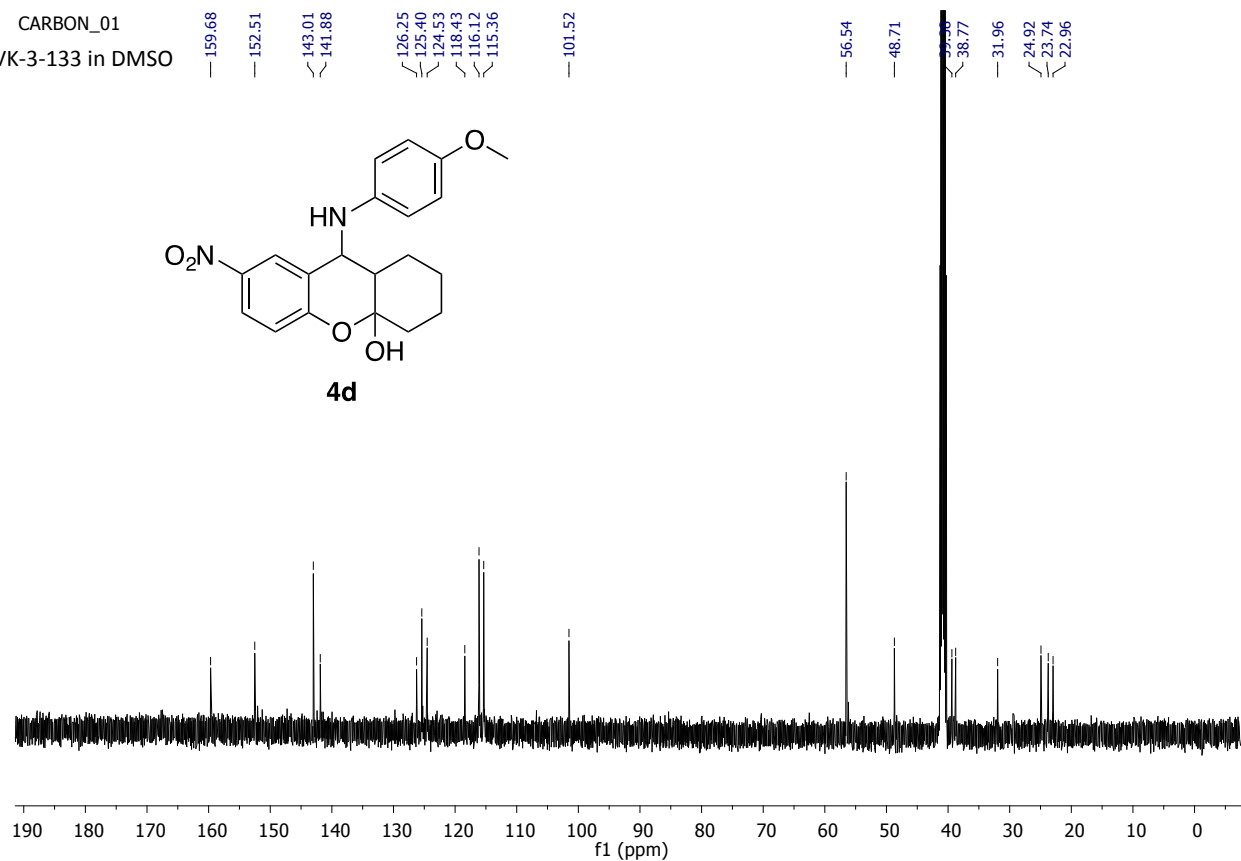

RS-1-193 in CDCl<sub>3</sub>

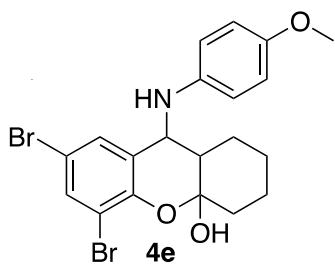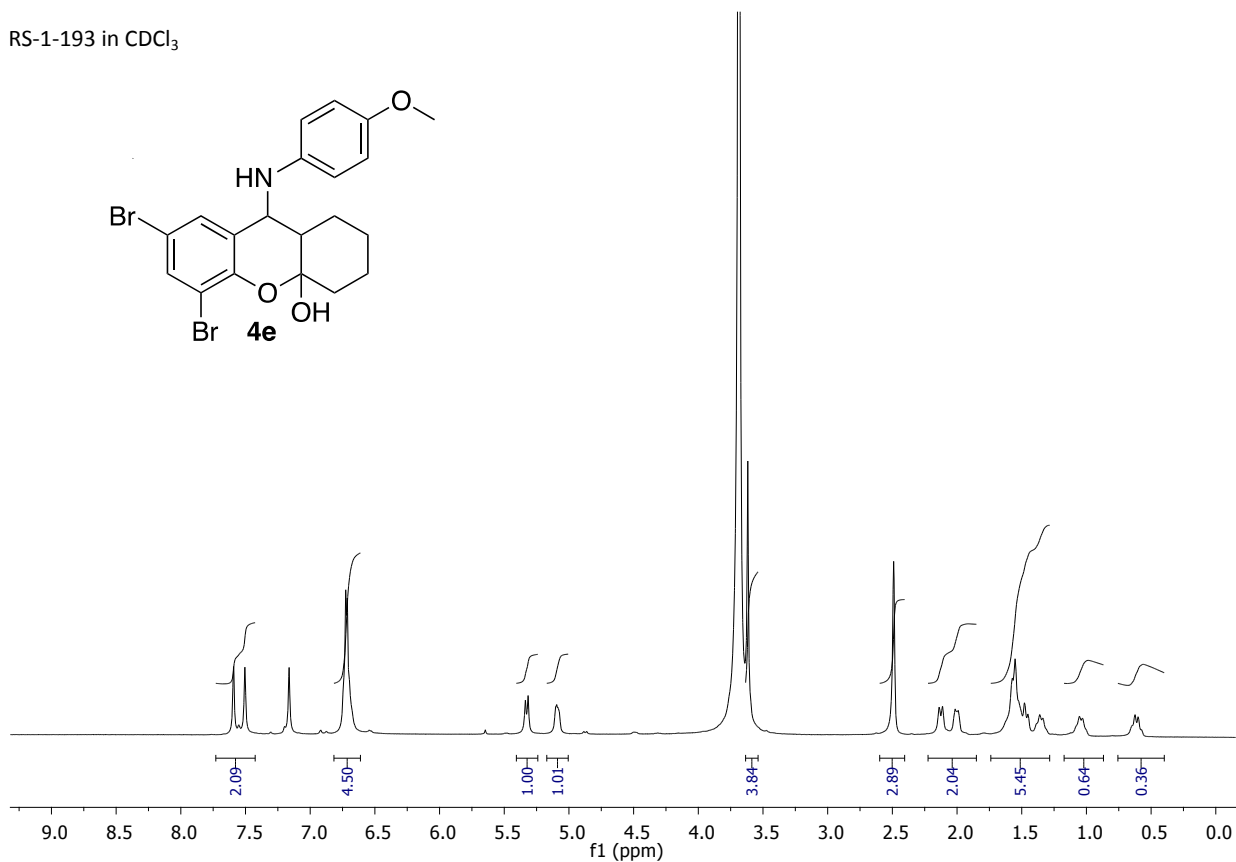

RS-1-193 in CDCl<sub>3</sub>

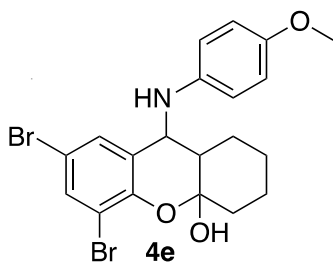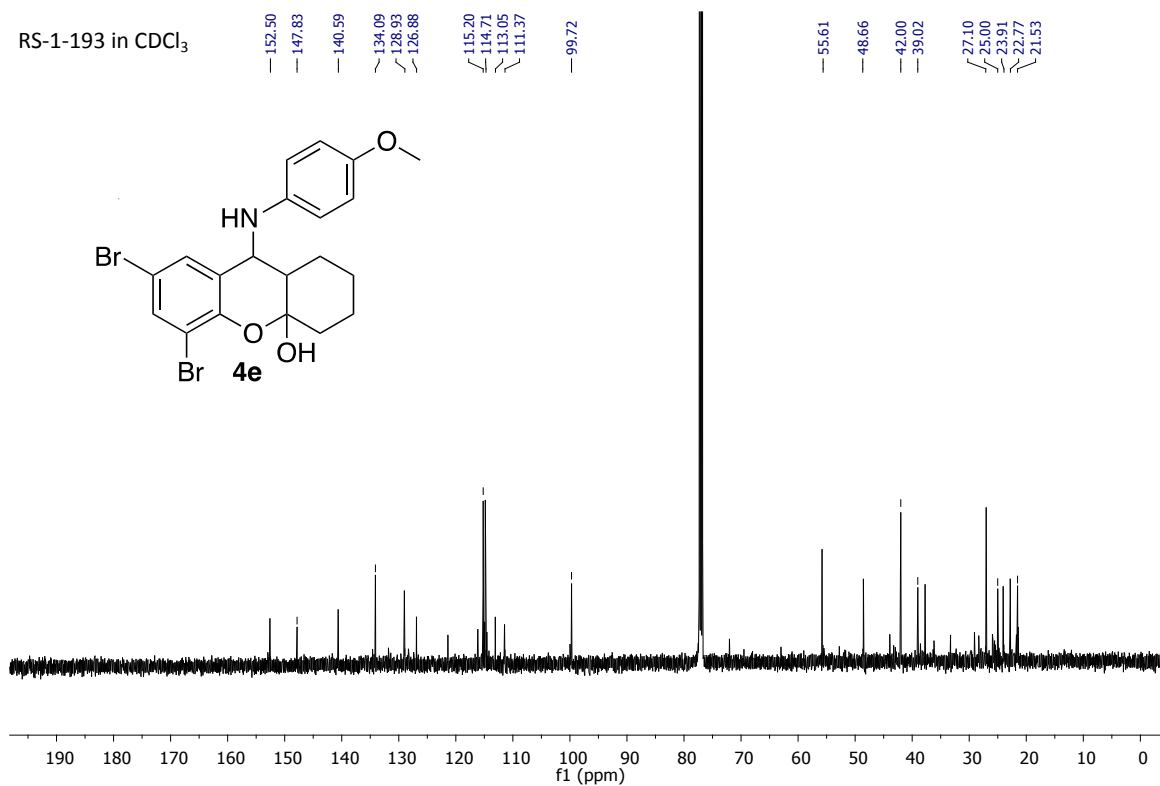

PROTON\_01

CVK-1-132 in CD<sub>3</sub>OD

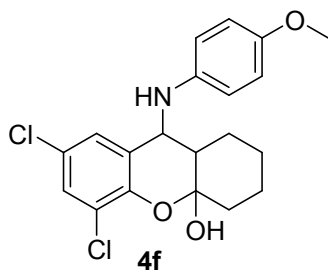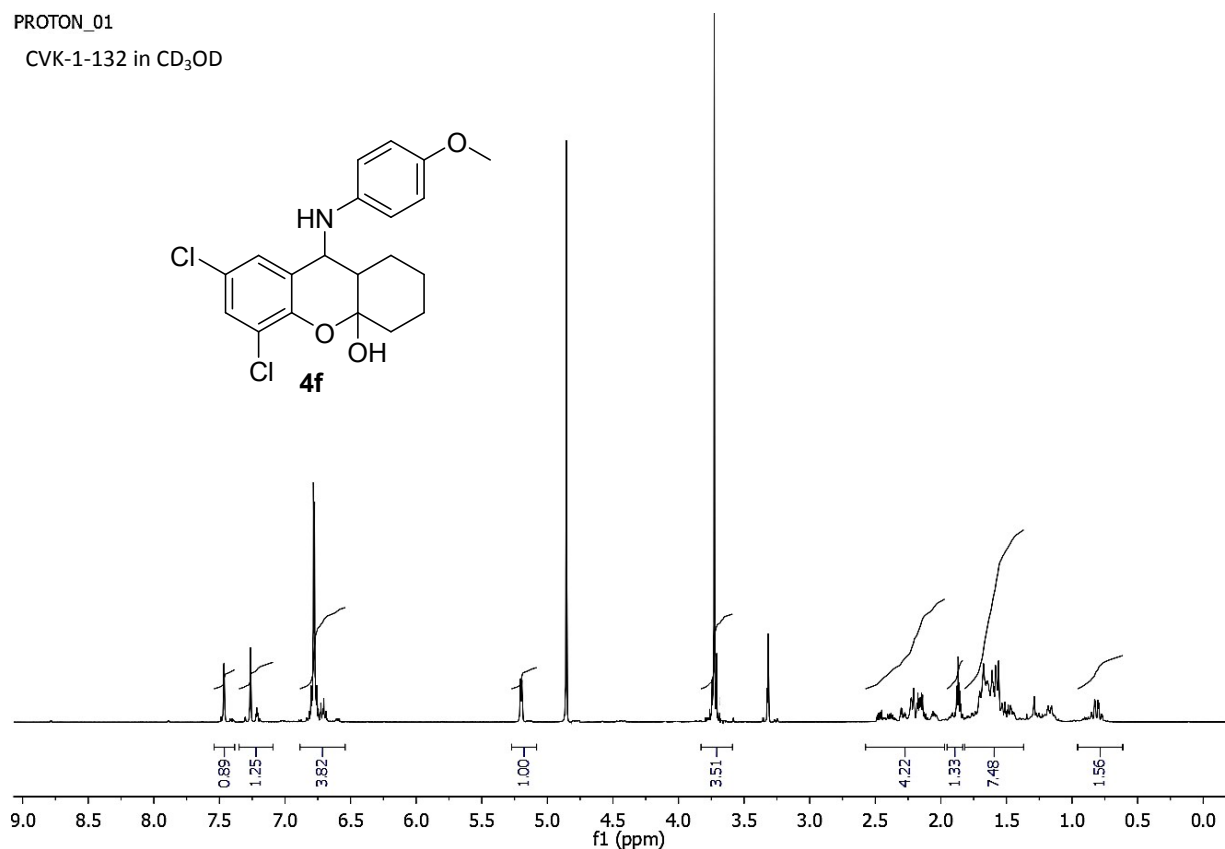

CARBON\_01

CVK-1-132 in CD<sub>3</sub>OD

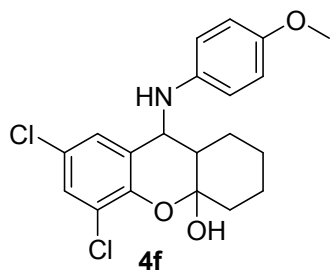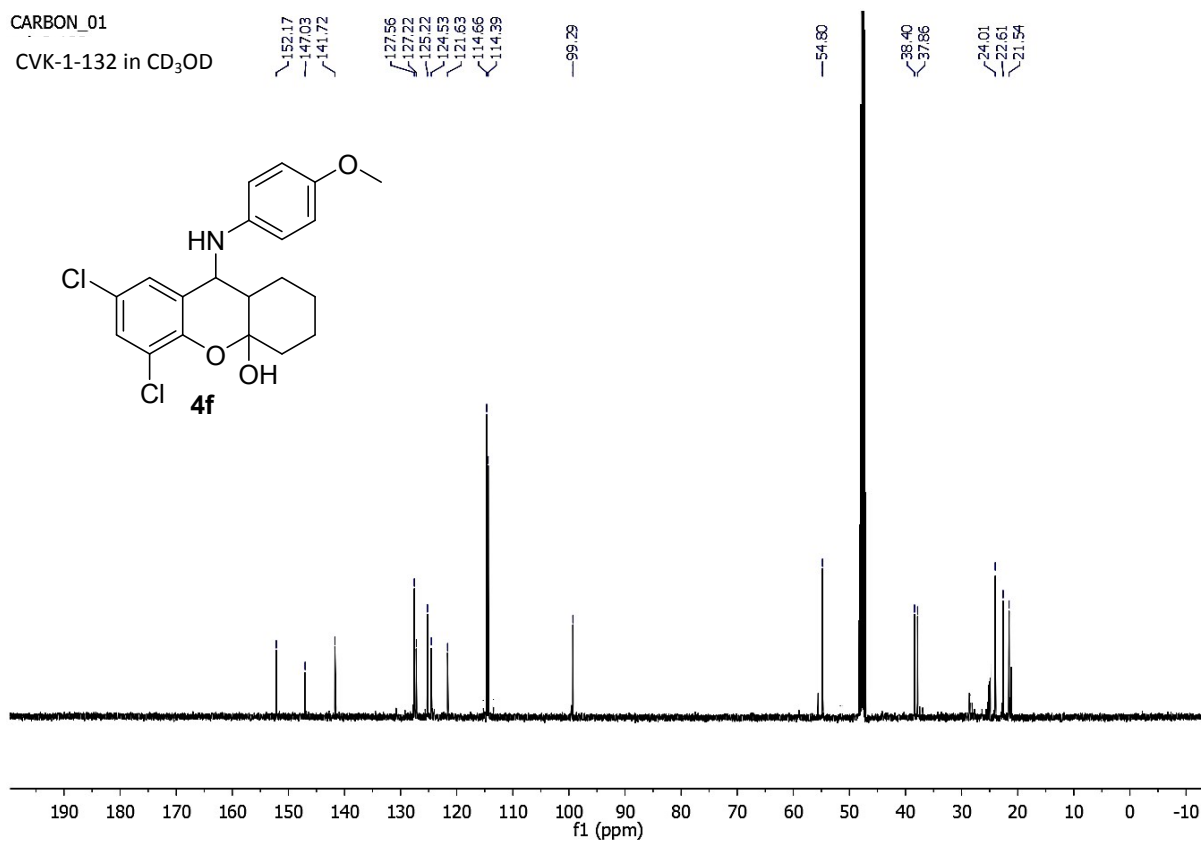

PROTON\_01  
CVK-1-134 in DMSO

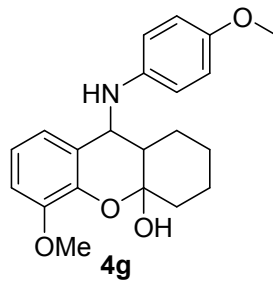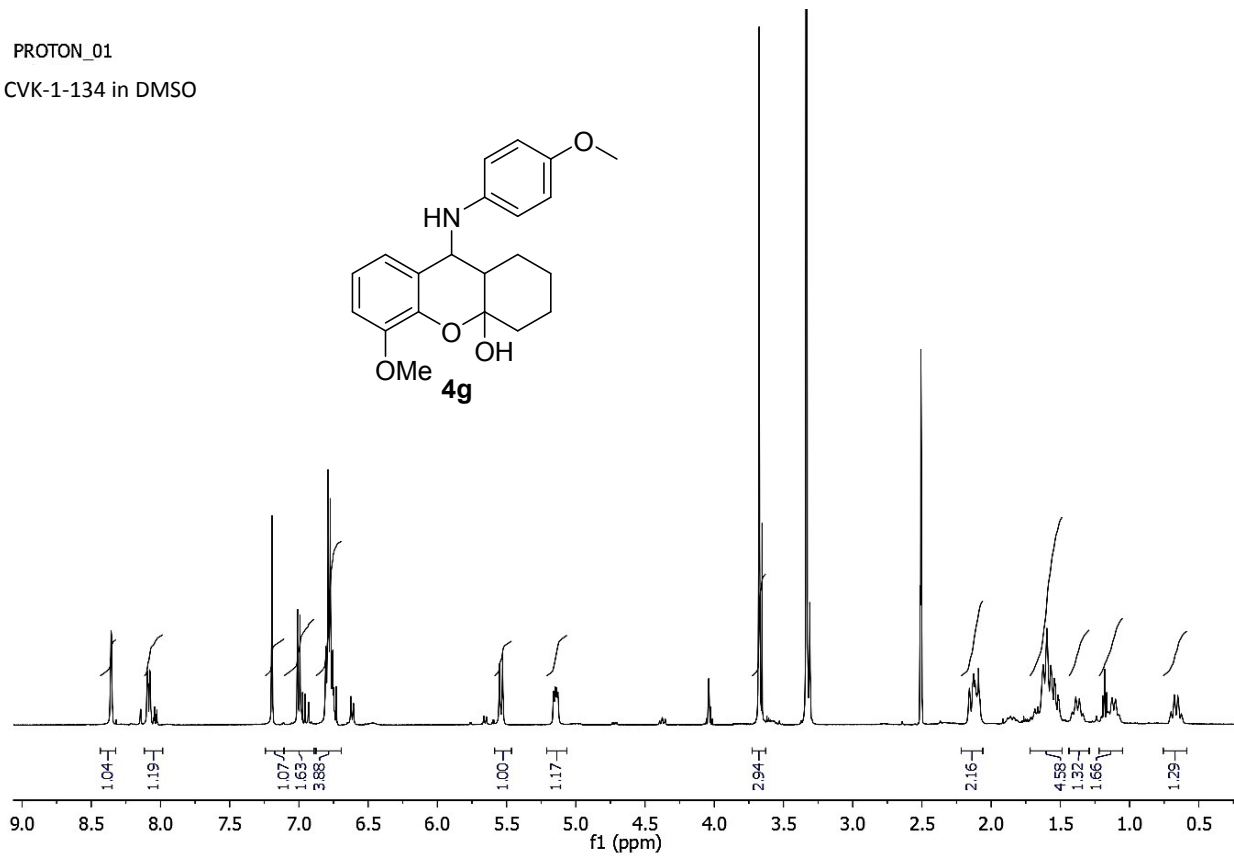

CARBON\_01  
CVK-1-134 in DMSO

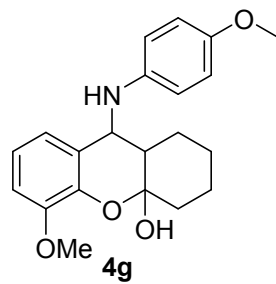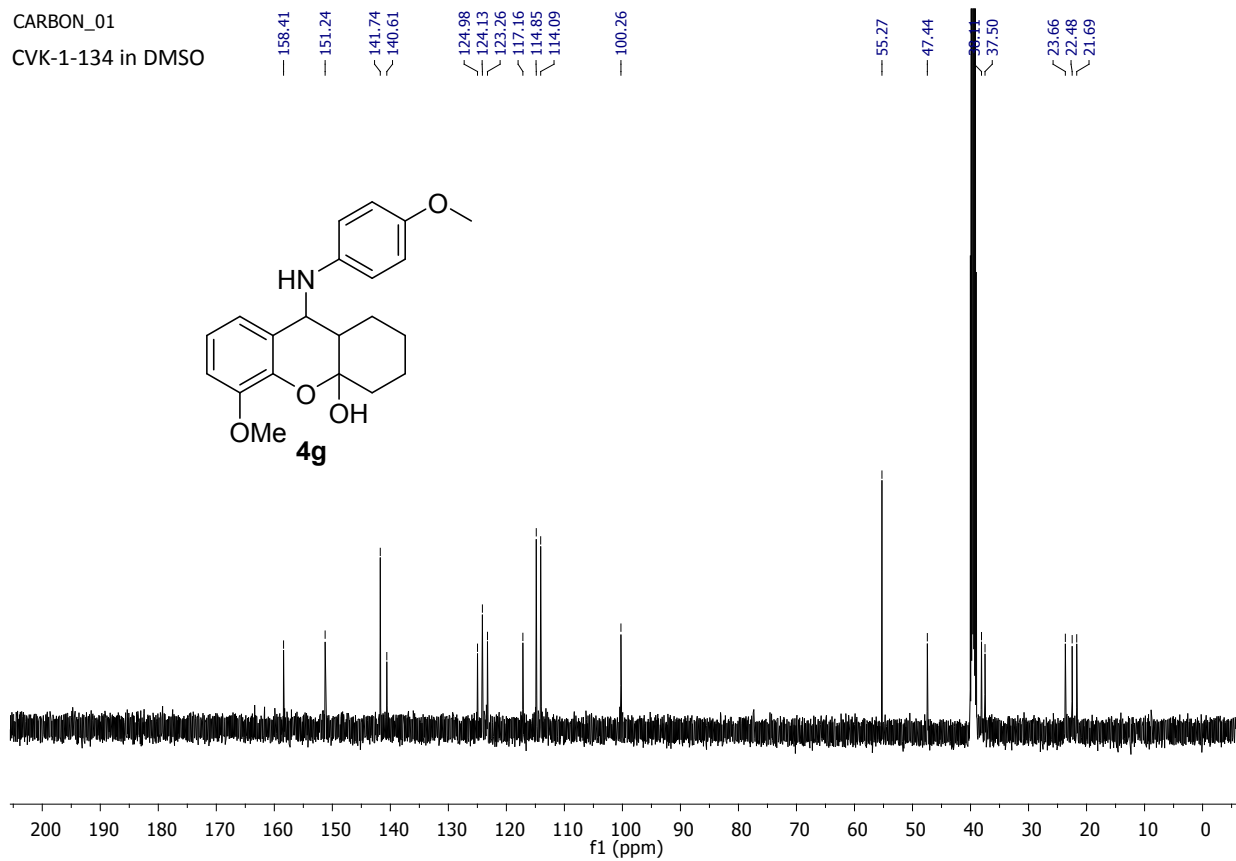

PROTON\_01  
CVK-4H in CD<sub>3</sub>OD

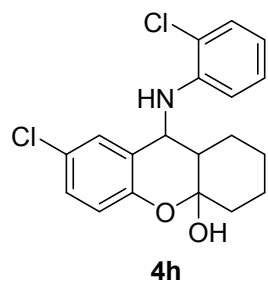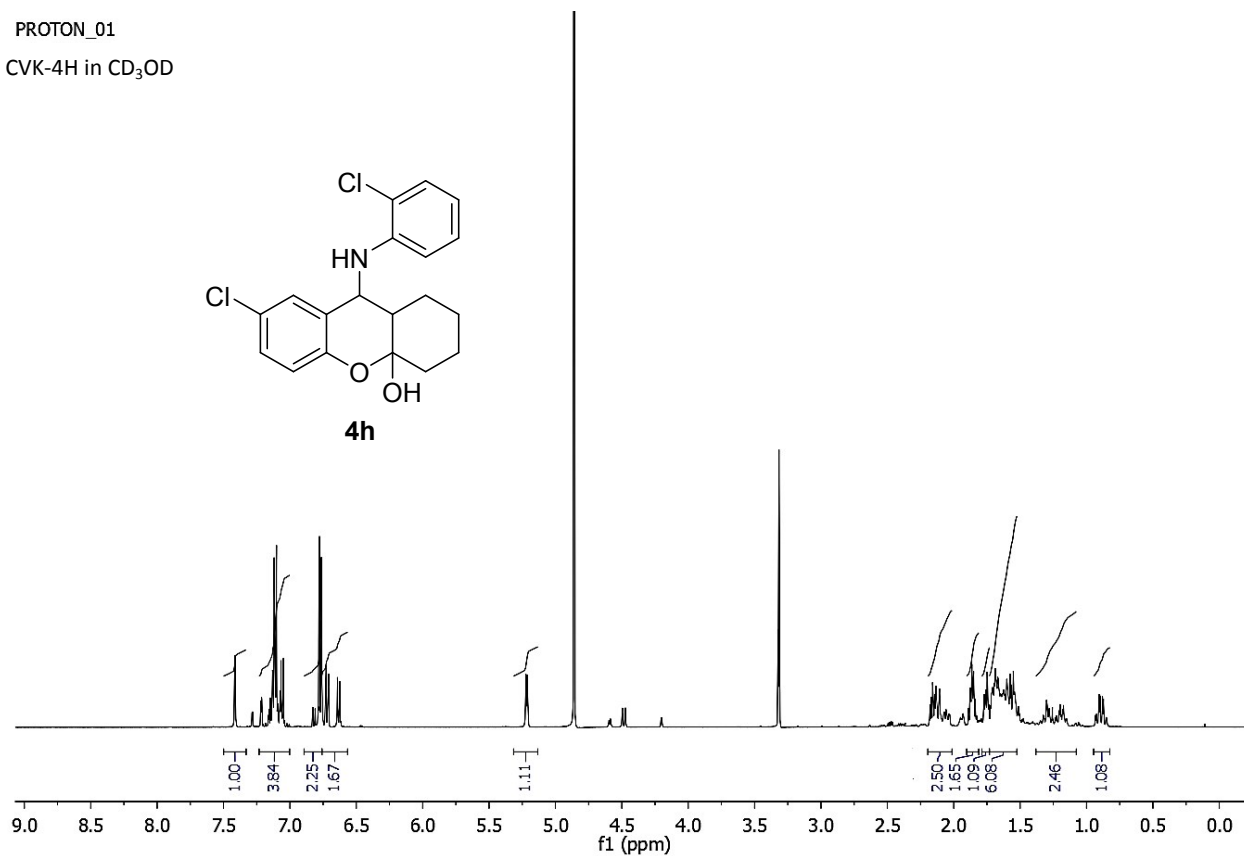

CARBON\_01  
CVK-4H in CD<sub>3</sub>OD

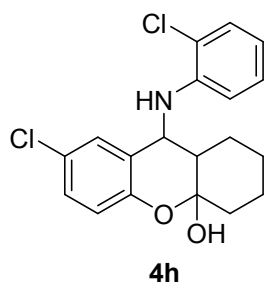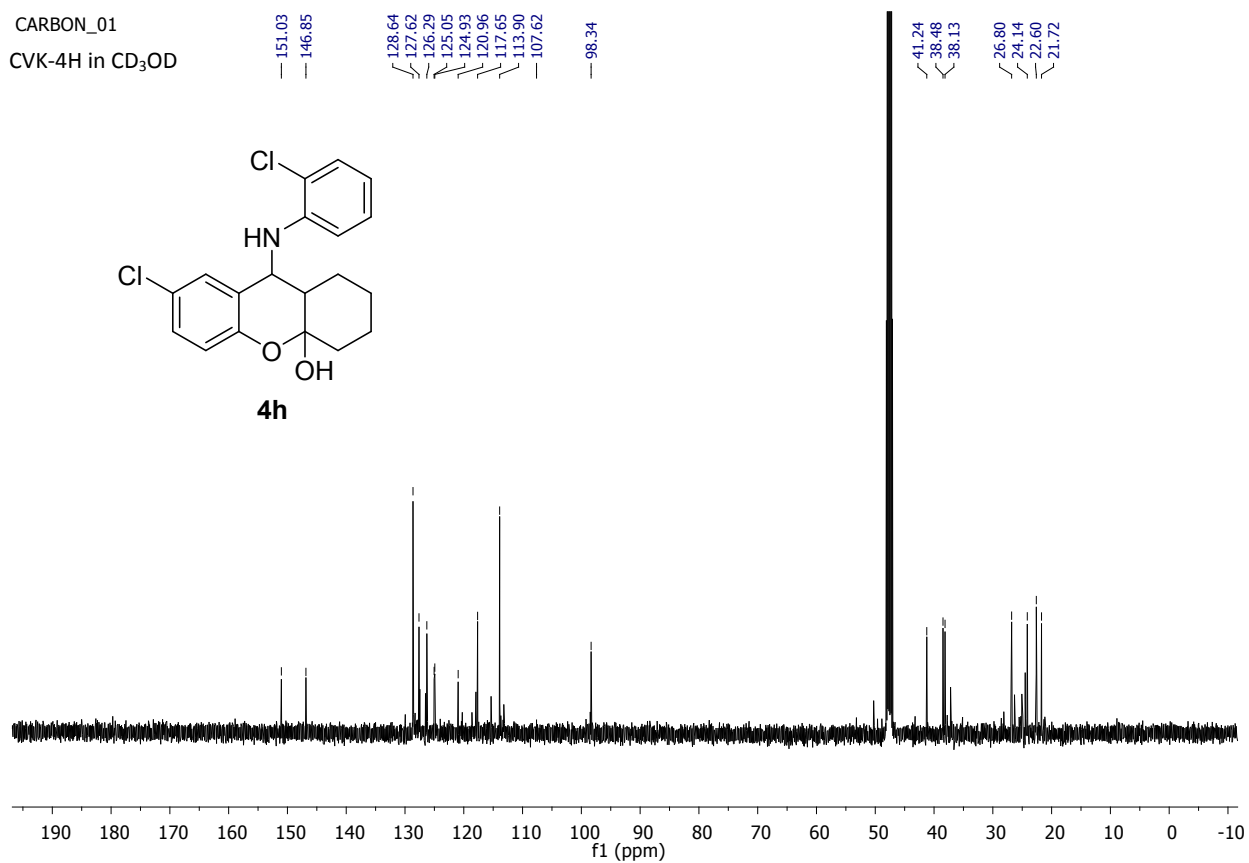

PROTON\_01  
cvk-3-136(4i) in CDCl3

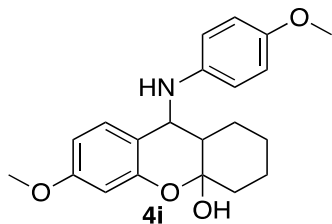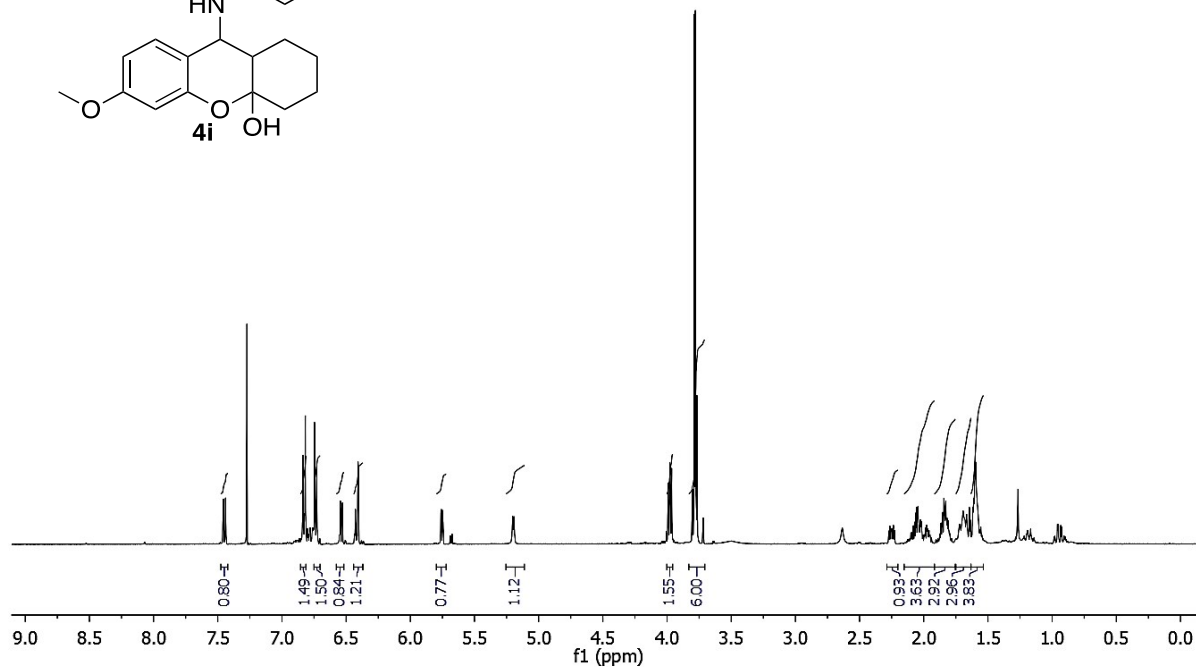

CARBON\_01  
cvk-3-136(4i) in CDCl3

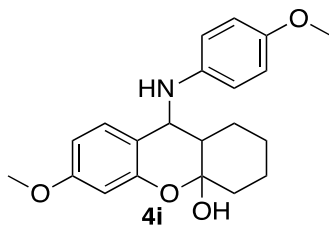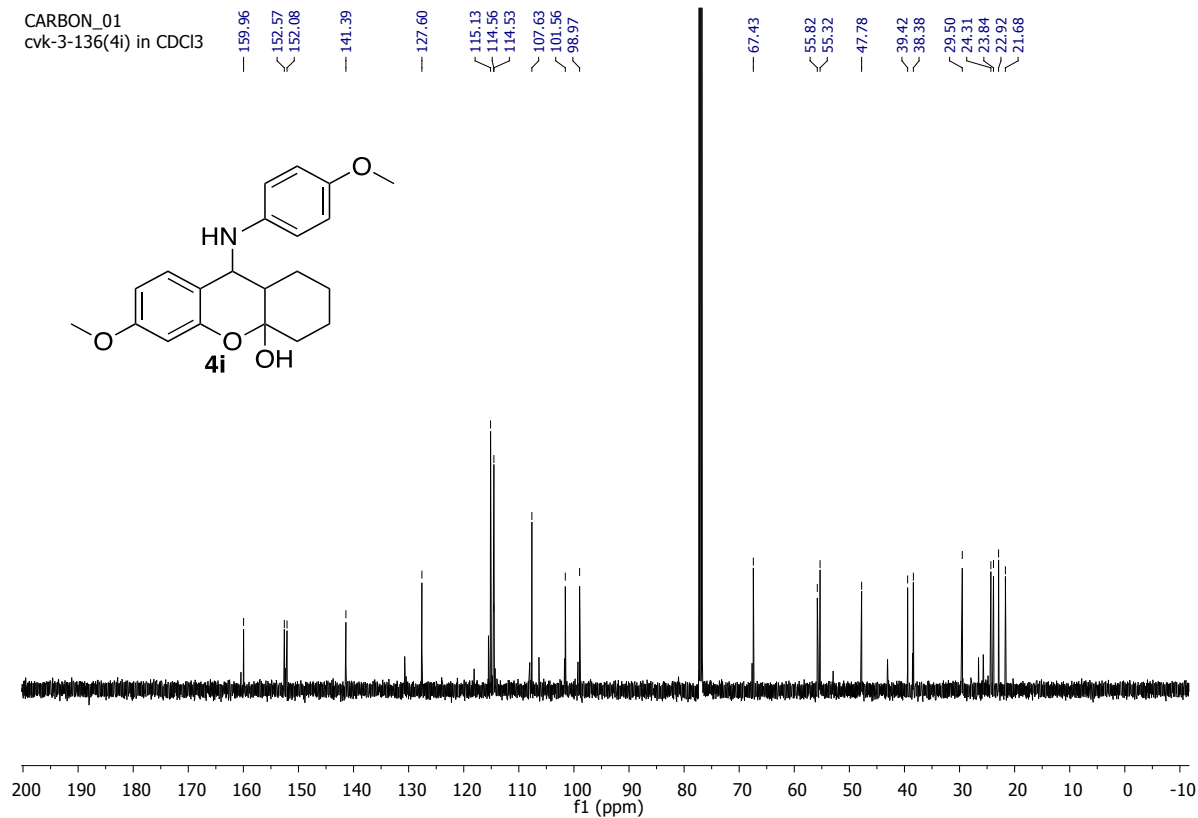

RS-1-198C in DMSO

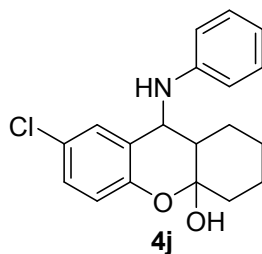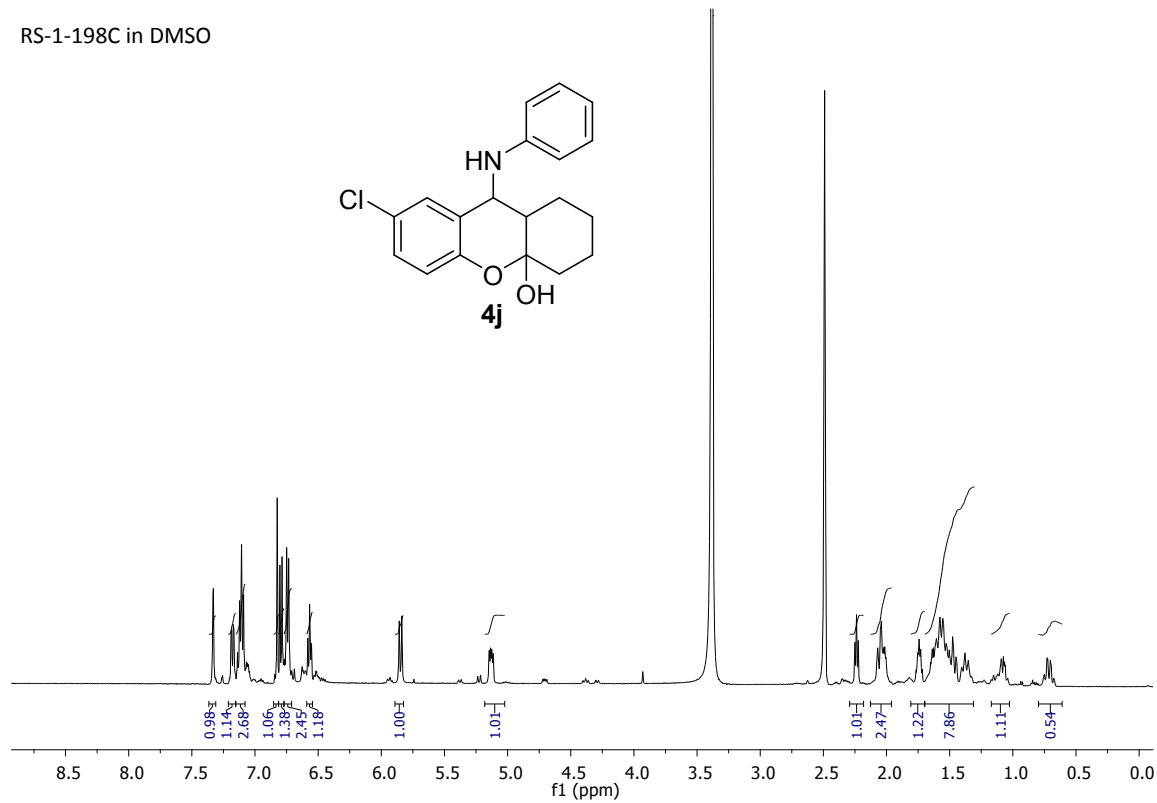

RS-1-198C in DMSO

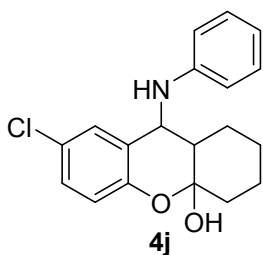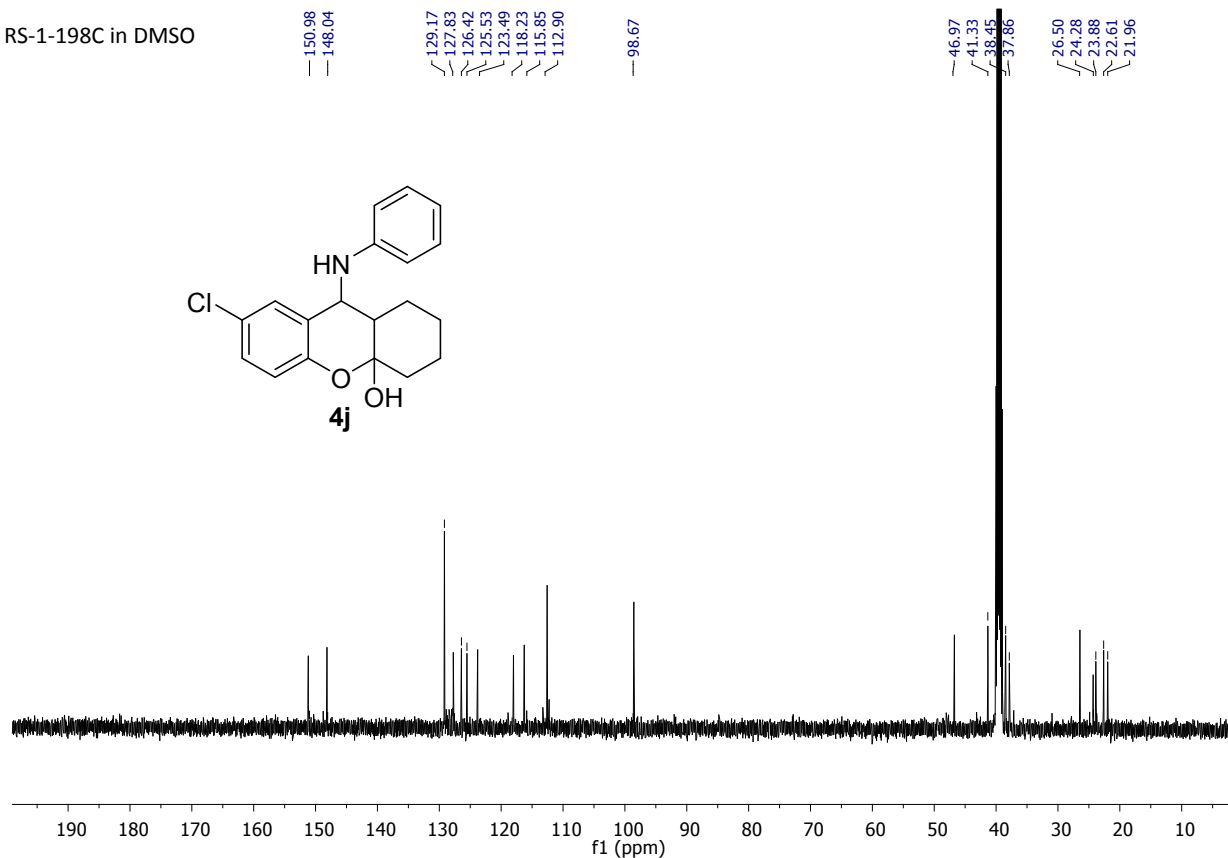

PROTON\_02  
4K in CD<sub>3</sub>OD

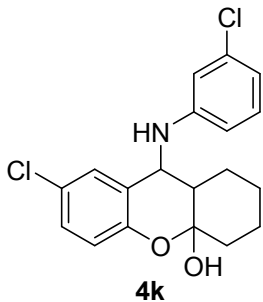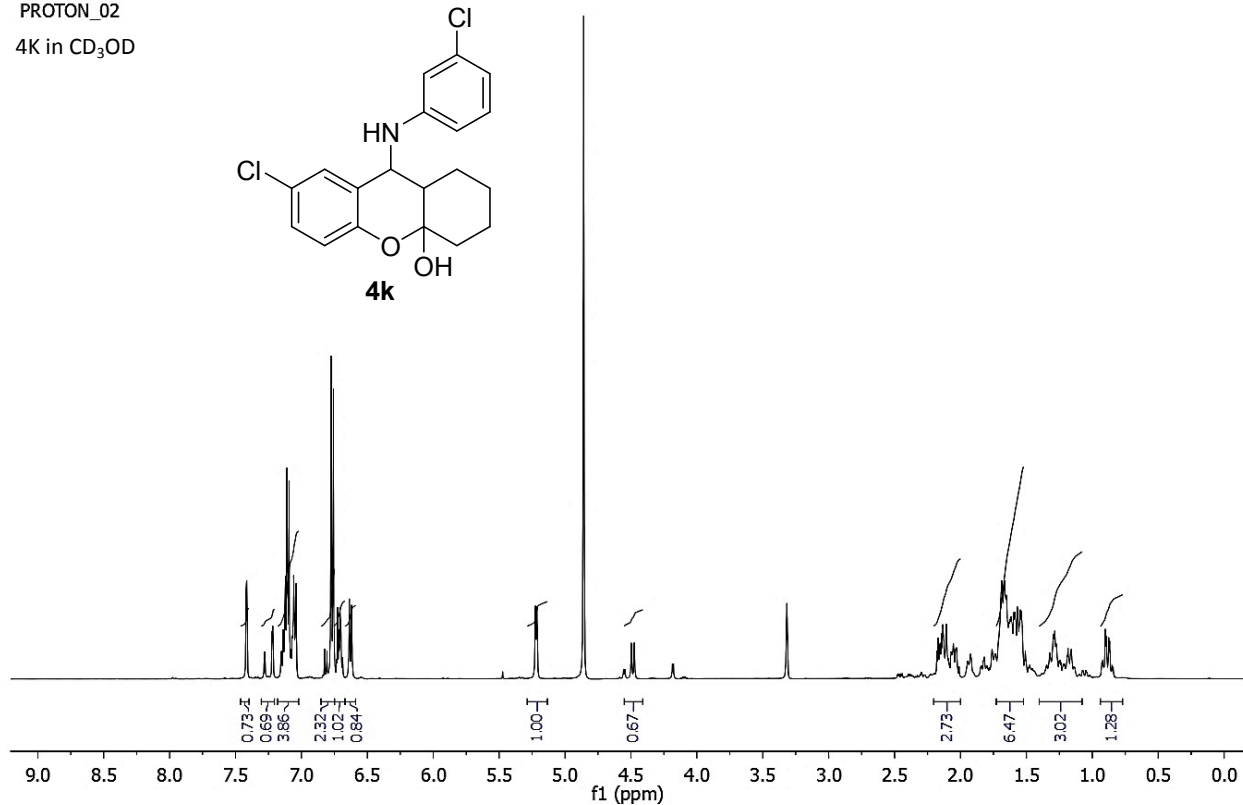

CARBON\_01  
4K in CD<sub>3</sub>OD

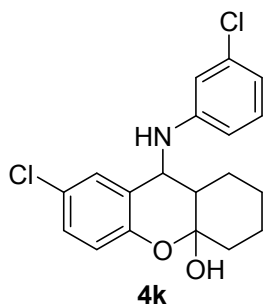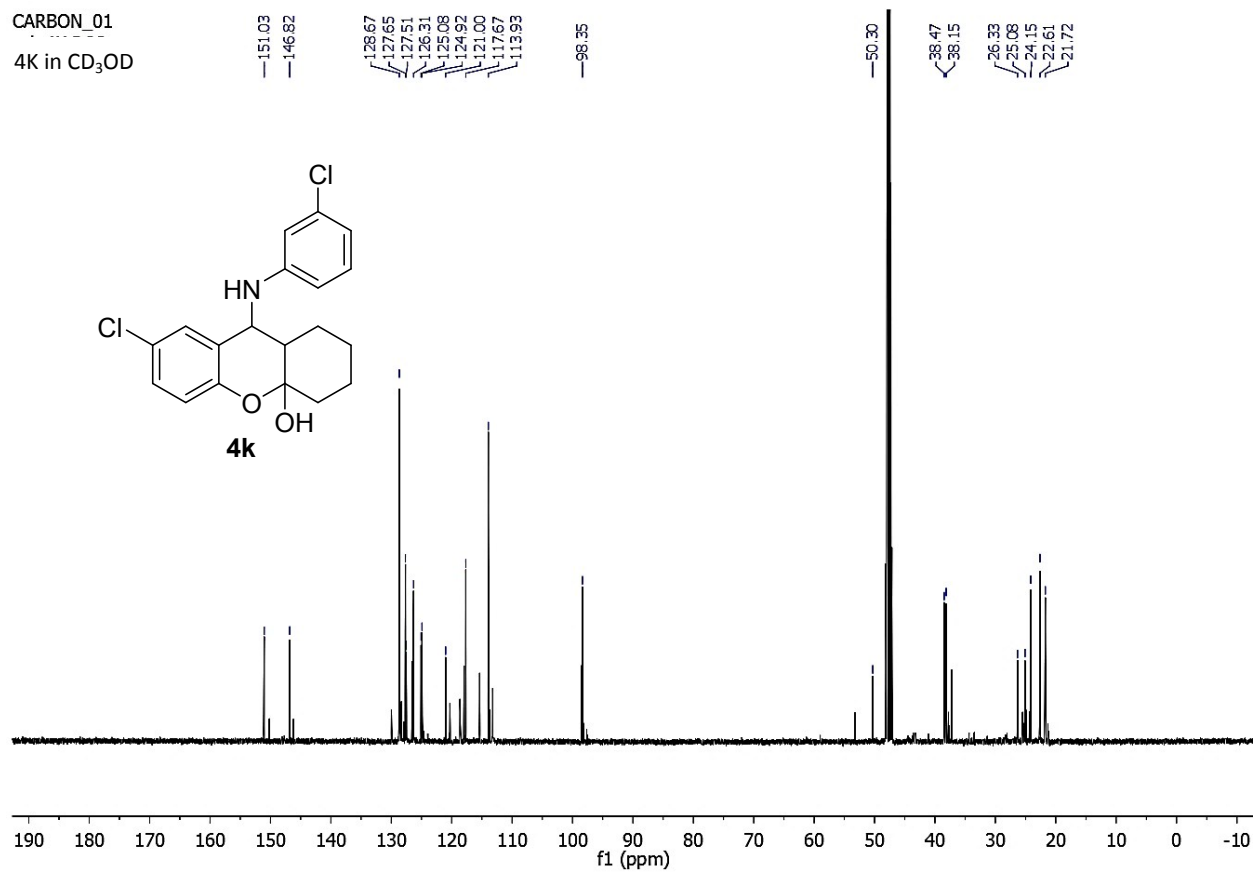



PROTON\_02  
CVK-4L in CD<sub>3</sub>OD

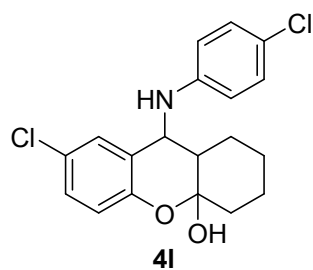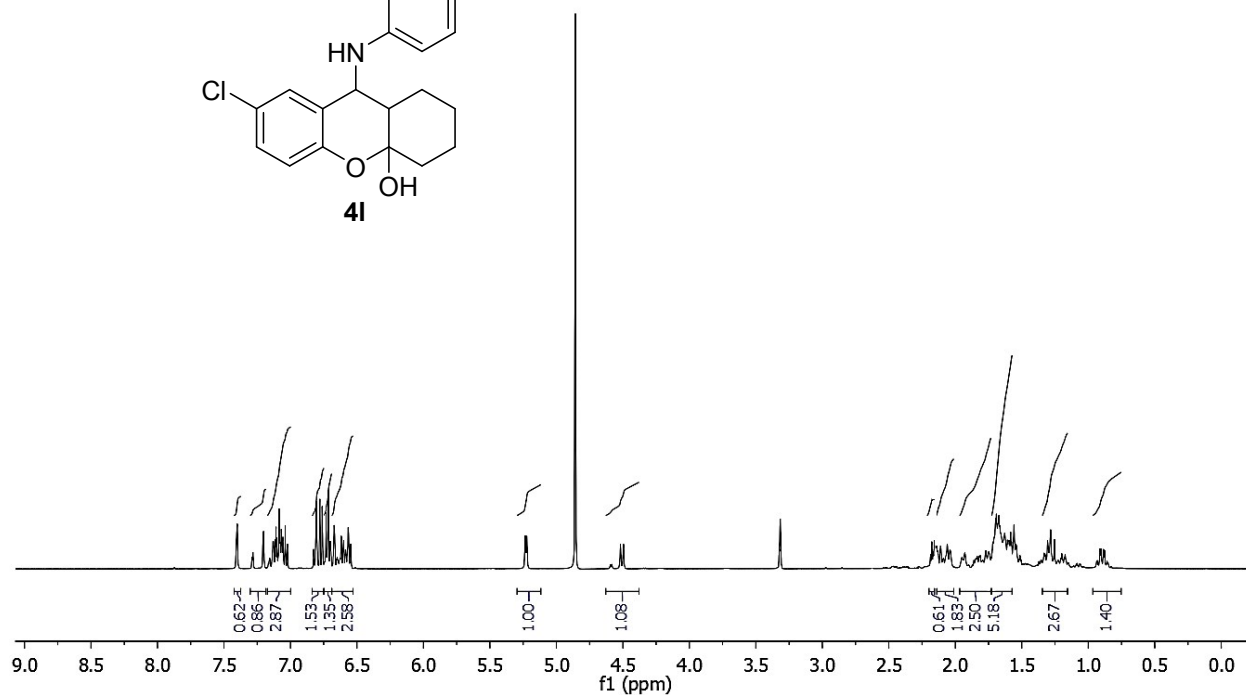

CARBON\_01  
CVK-4L in CD<sub>3</sub>OD

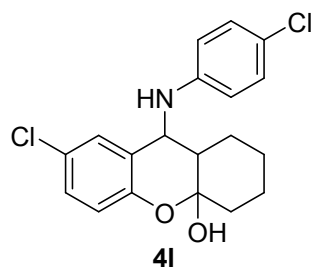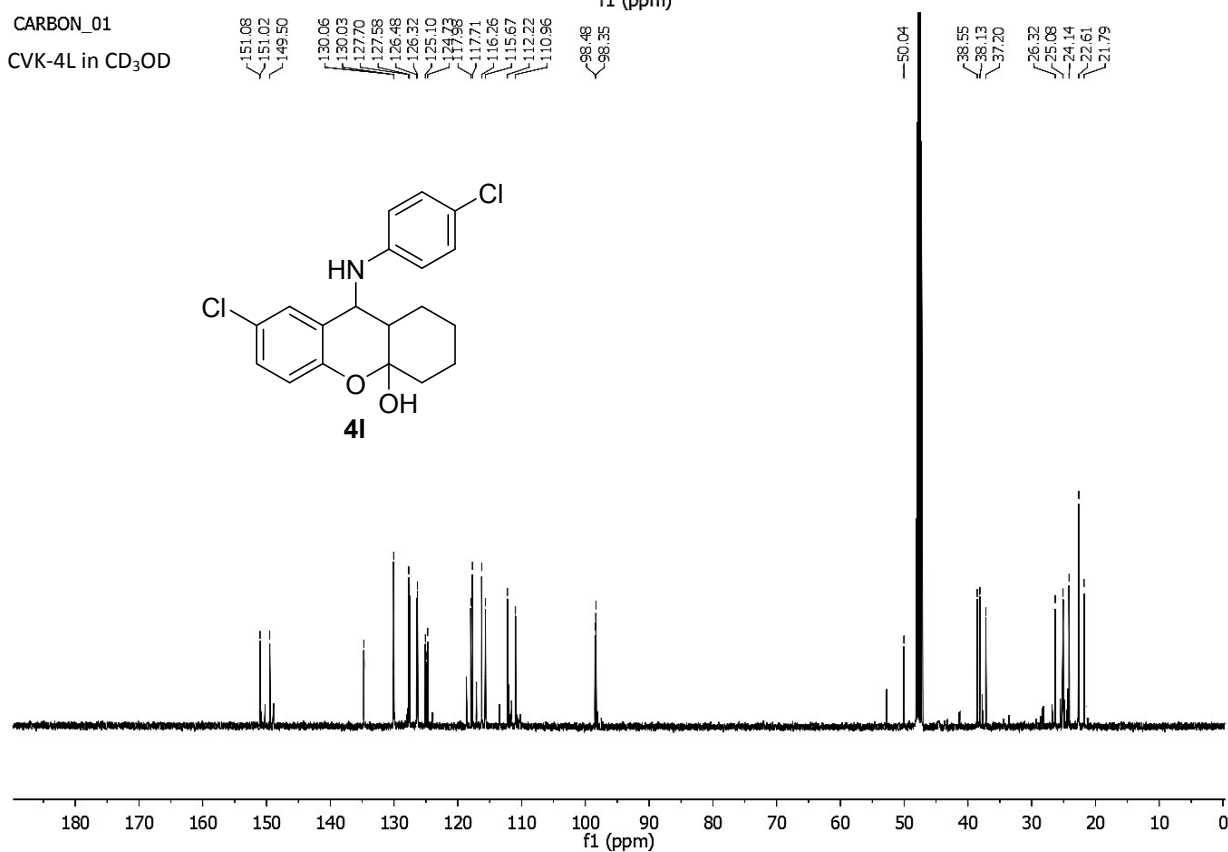

PROTON\_01

CVK-4m in DMSO

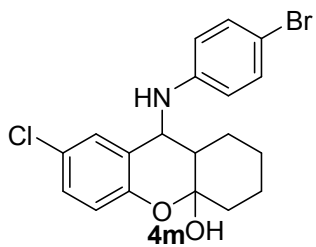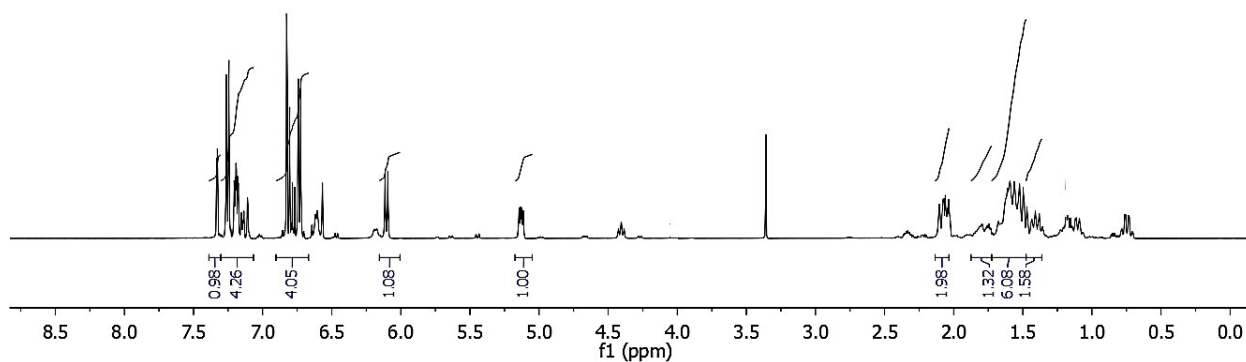

CARBON 01

CVK-4m in DMSO

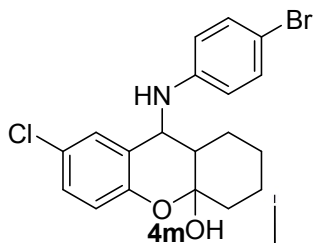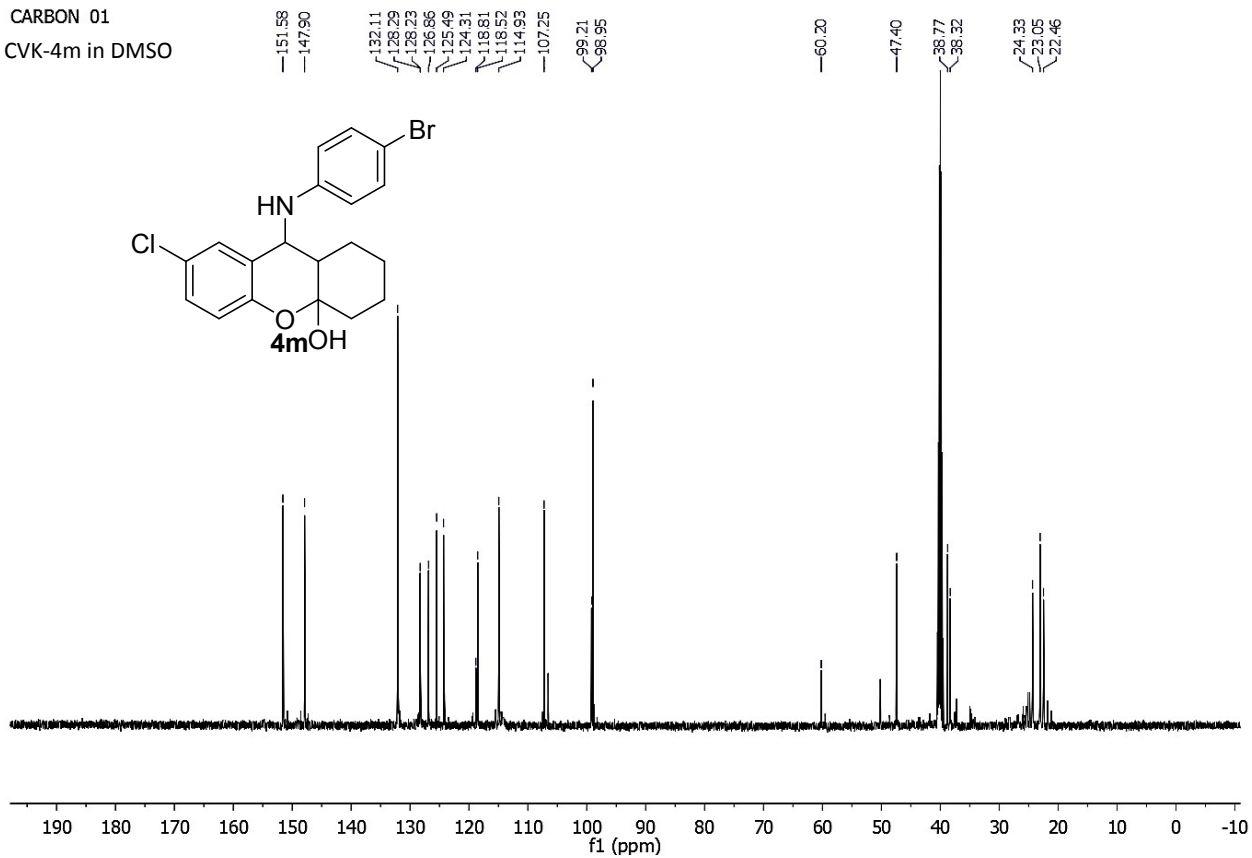

RGS-2-14 in DMSO

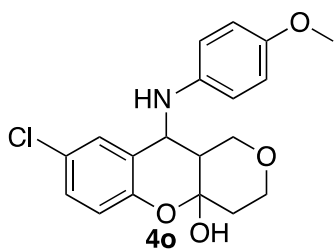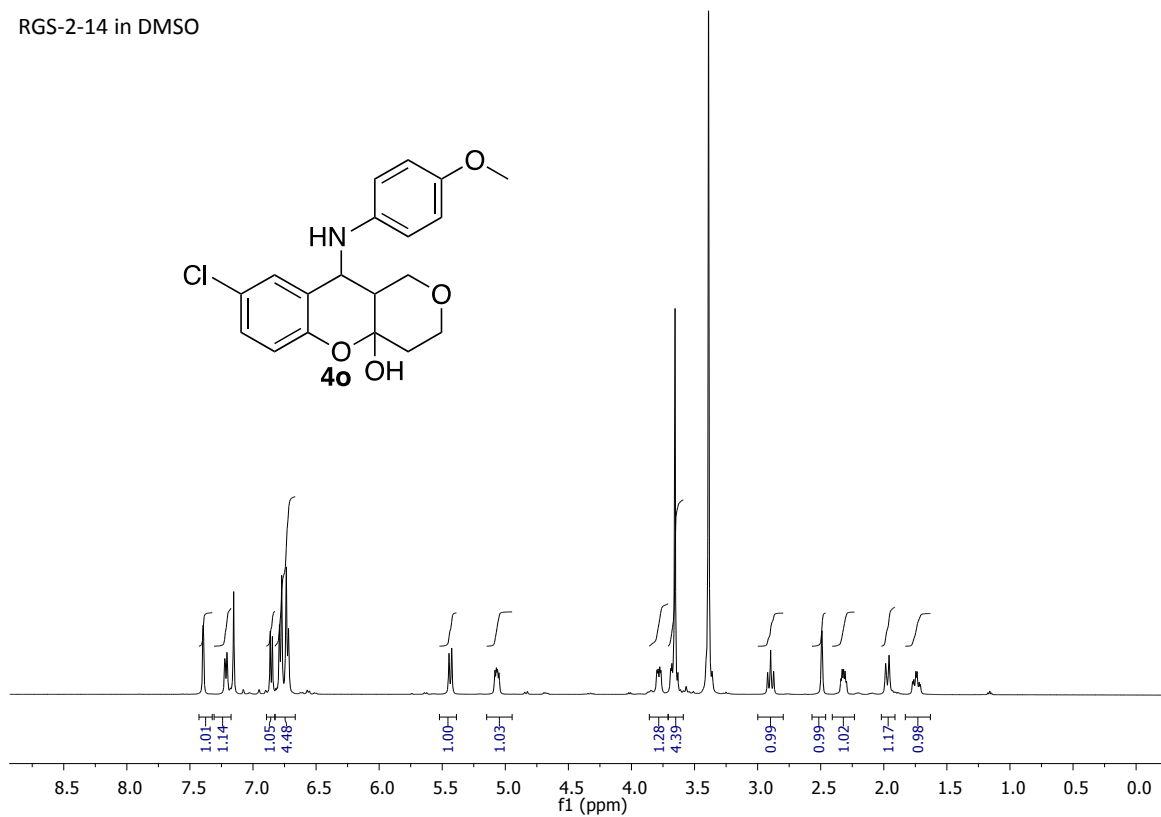

RGS-2-14 in DMSO

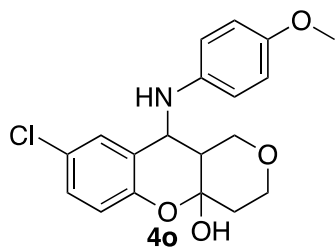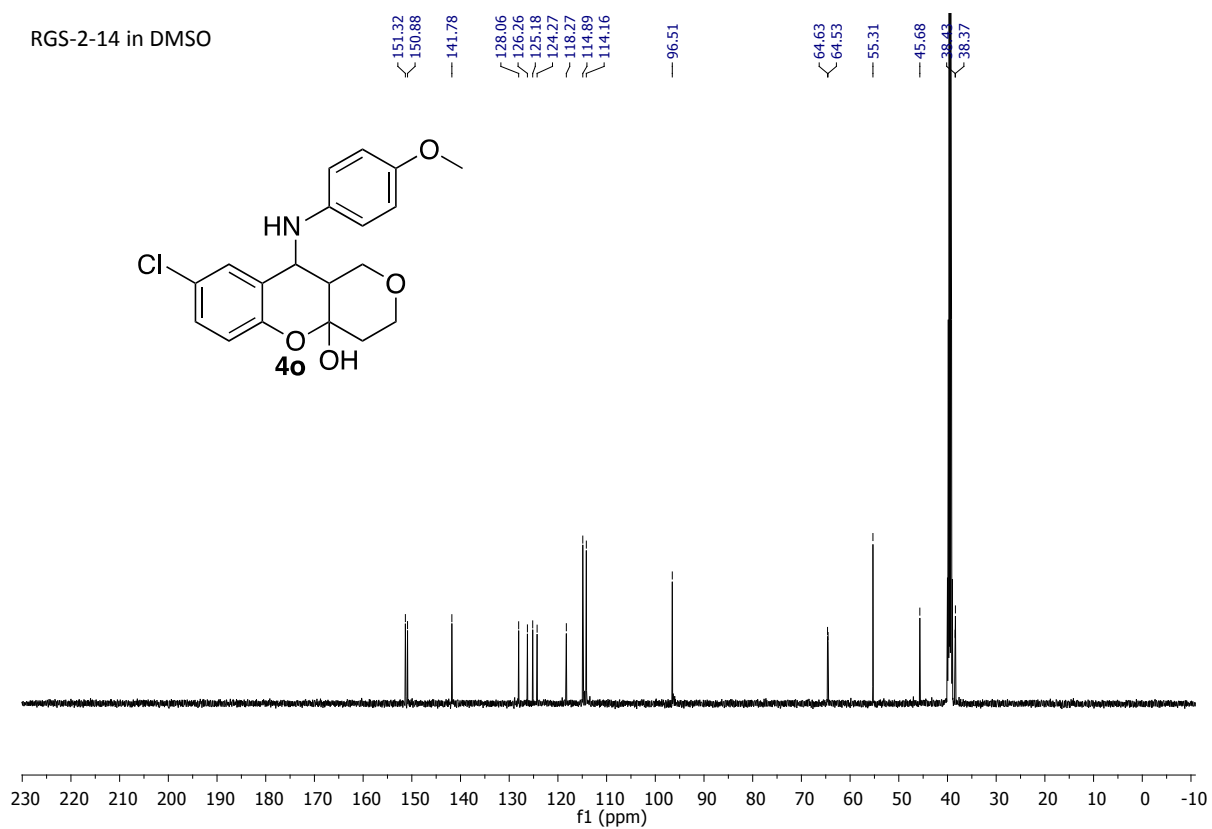

RGS-2-15 in DMSO

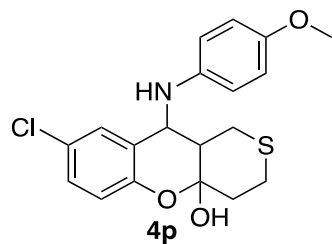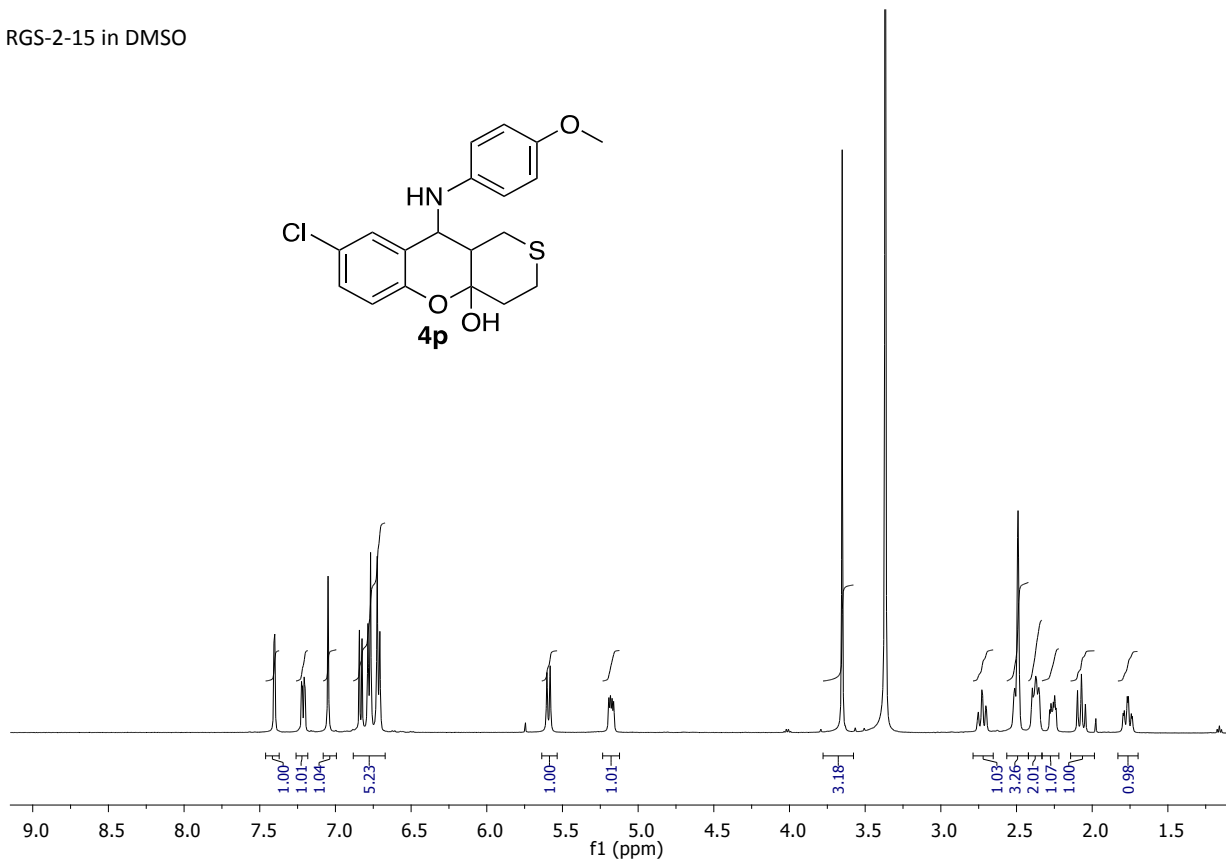

RGS-2-15 in DMSO

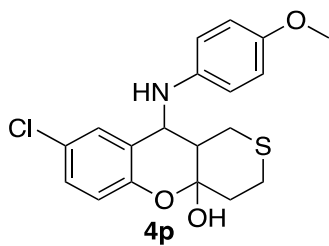

RGS-2-15  
RGS-2-15 C

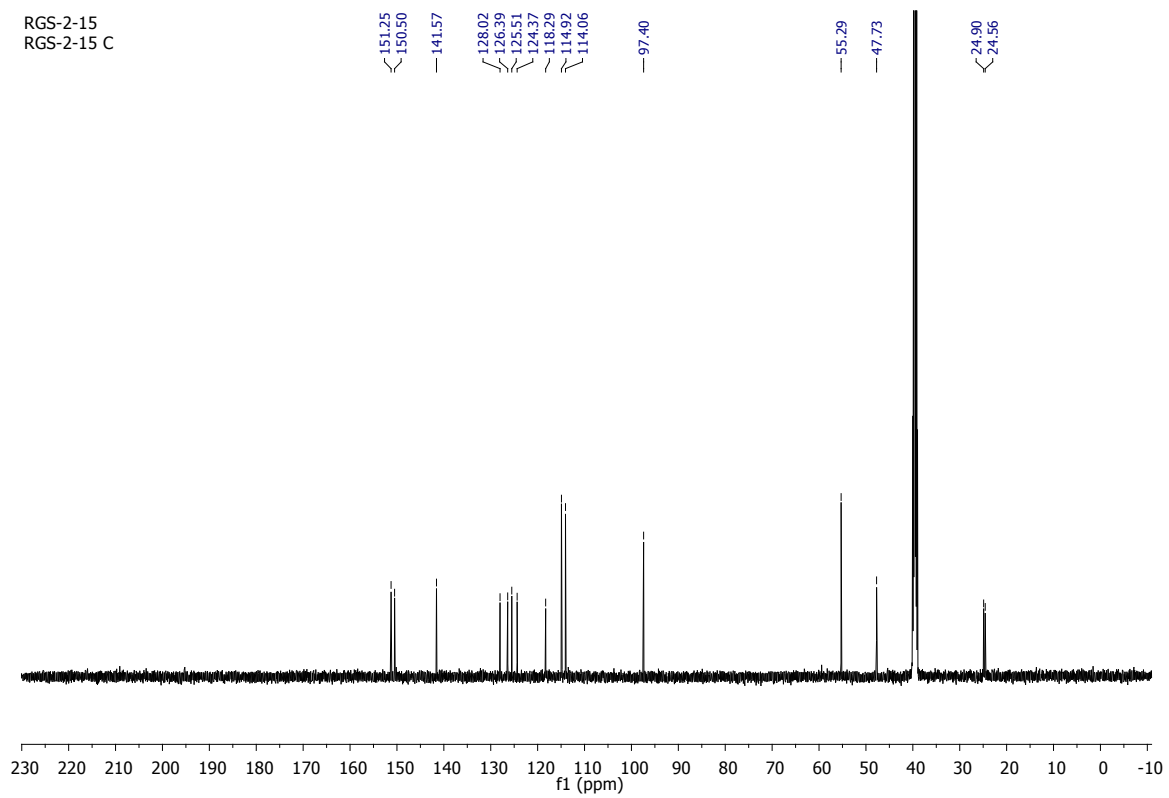

PROTON\_01

CVK-4Q in DMSO

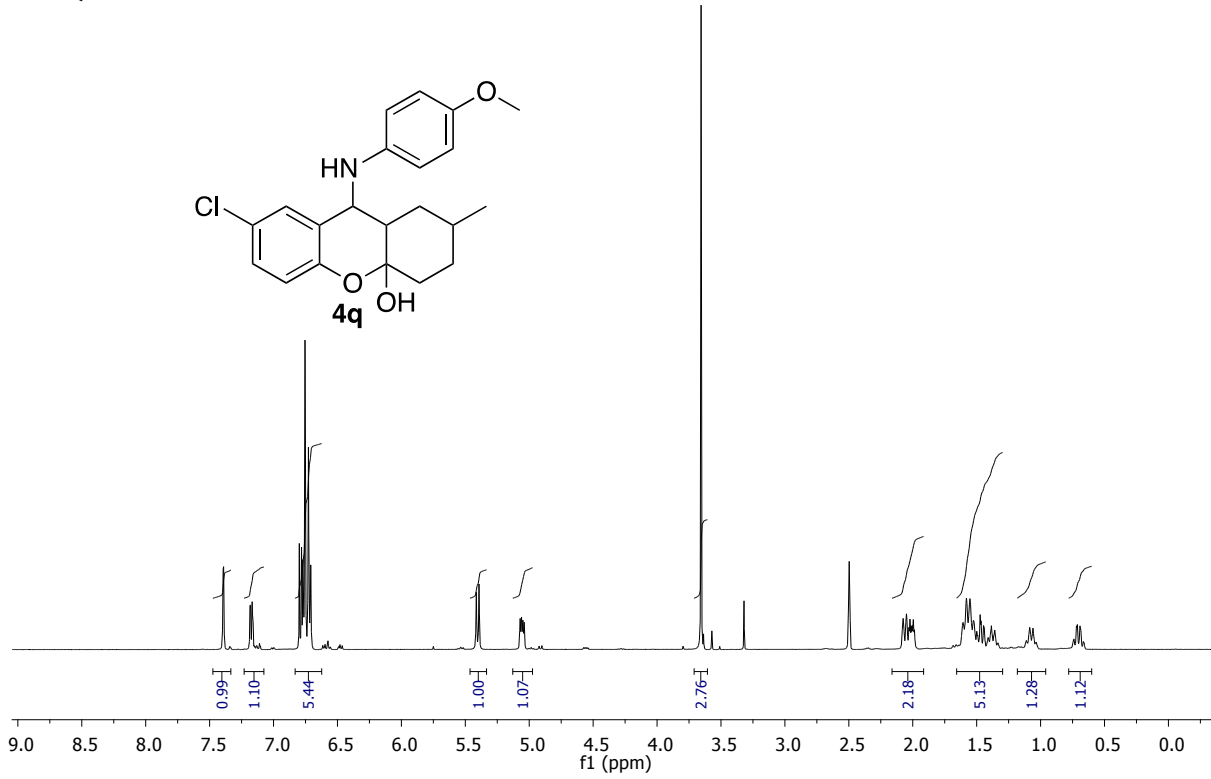

CARBON\_01  
cvk-4Q-RGS

151.60  
151.44  
142.52  
128.07  
126.86  
126.33  
124.19  
118.35  
115.26  
114.30  
99.02  
55.73  
47.91  
38.79  
38.36  
24.35  
23.07  
22.27

CVK-4Q in DMSO

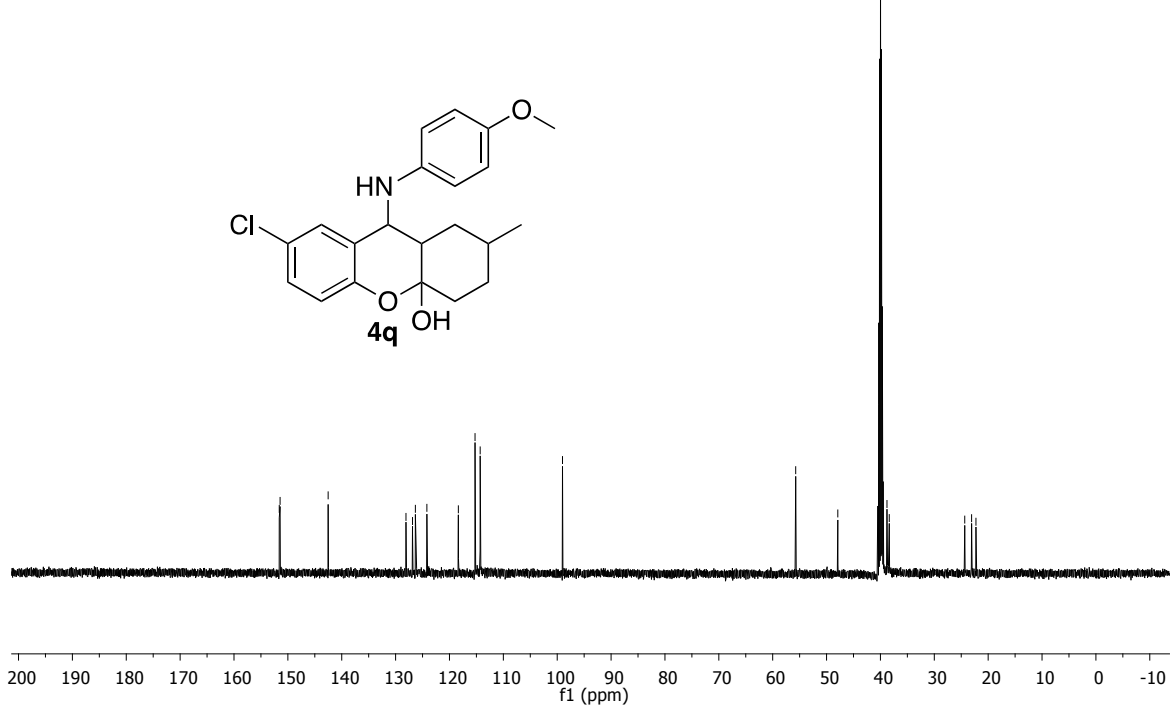

RGS-4R in CDCl<sub>3</sub>

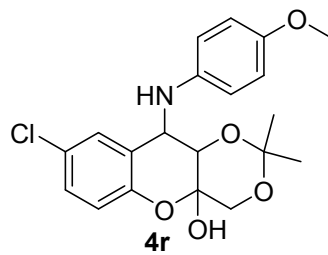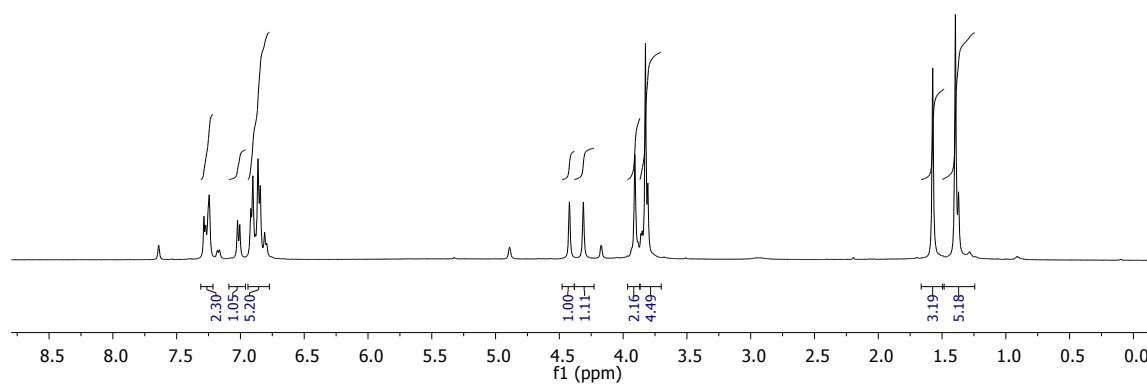

<sup>13</sup>C NMR RGS-4R in CDCl<sub>3</sub>

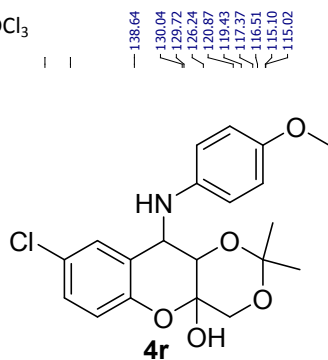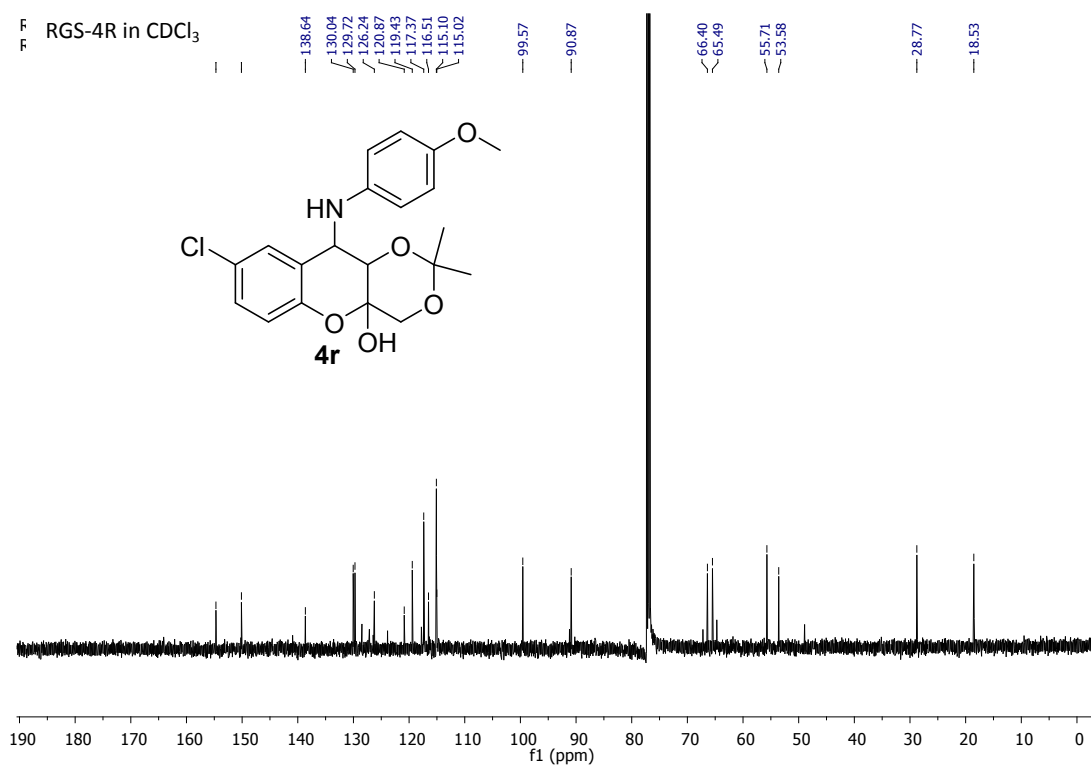

PROTON\_02  
CVK-3-135 in CDCl<sub>3</sub>

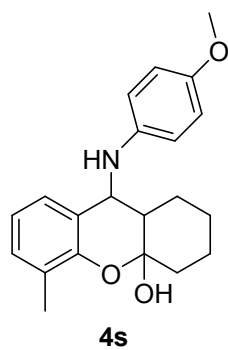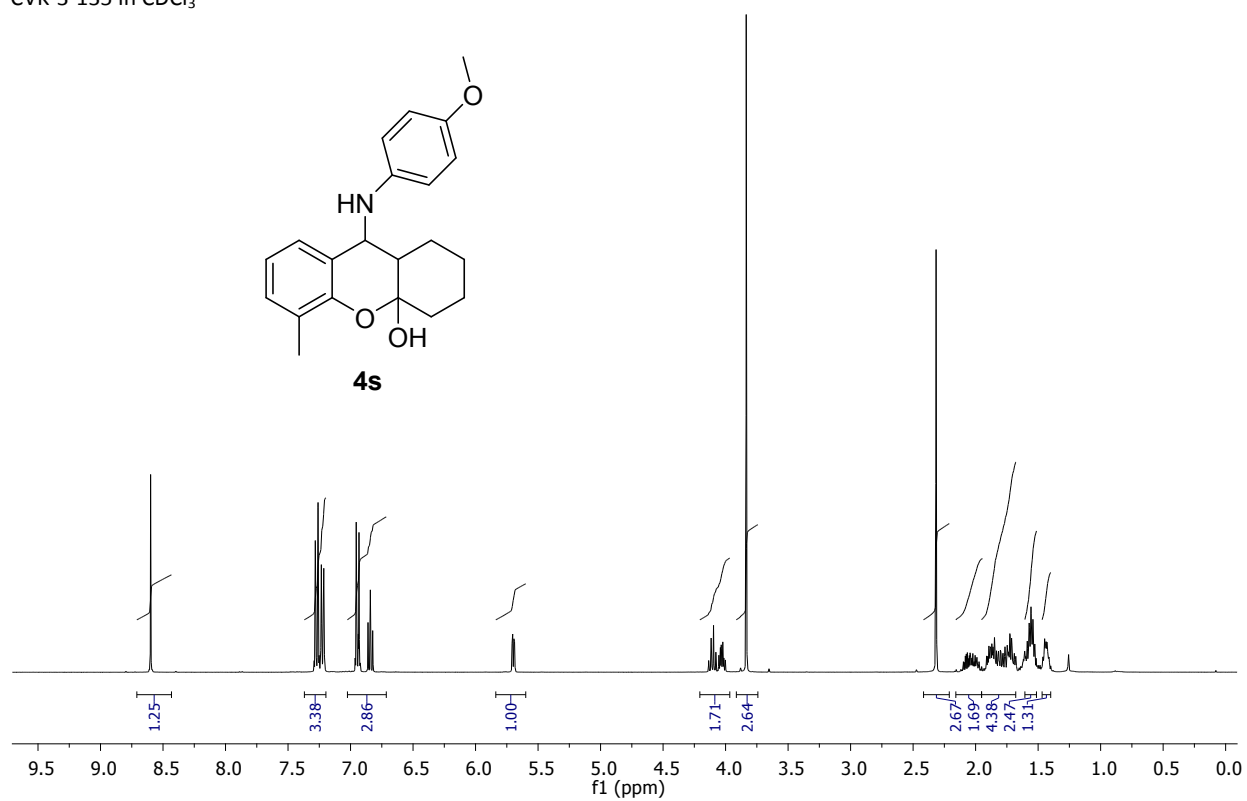



CARBON\_01  
CVK-3-135 in CDCl<sub>3</sub>

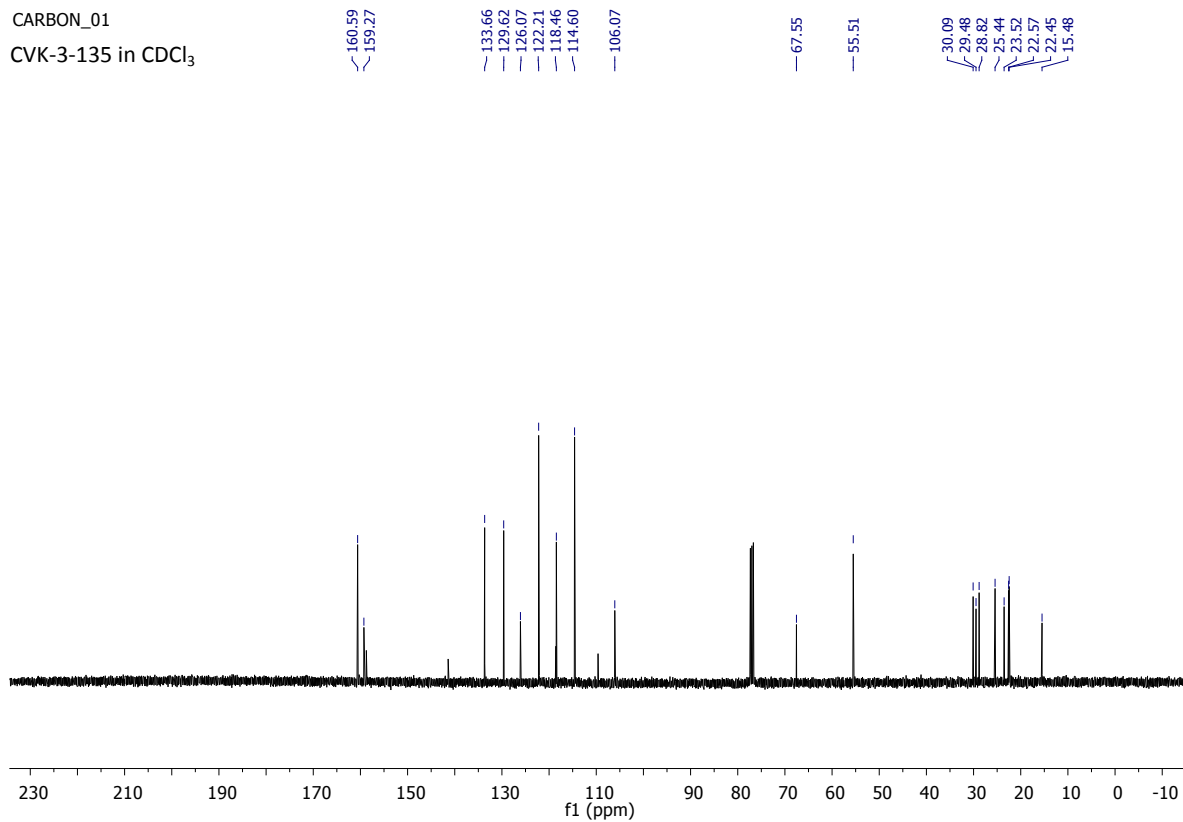

### VIII. X-Ray crystal Structure of **4a**

X-ray crystallographic data of **4a** complex (CCDC,1518410): crystals were grown through slow vapor diffusion of cyclohexane into the chloroform solution of the **4a**; color of the crystal: colorless plates; T: 173 K; molecular formula: C<sub>20</sub>H<sub>23</sub>NO<sub>3</sub>; space group: P2<sub>1</sub>/n; unit cell parameters: a = 11.6820 (6), b = 7.2674 (4), c = 20.0741 (10); alpha = 90, beta = 103.443 (4), gamma = 90; R = 0.0634 (2206), wR2 = 0.1652 (2980).

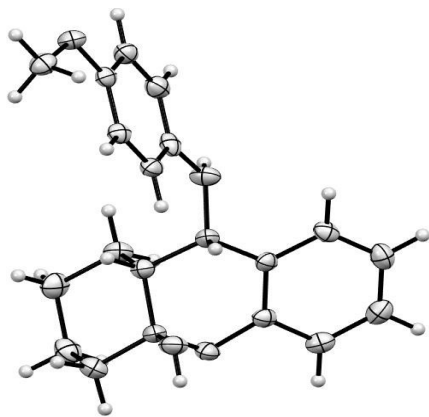

**Figure 2:** X-ray crystal structure of **4a**

## IX. IR Spectroscopy Data

### Compound 4a

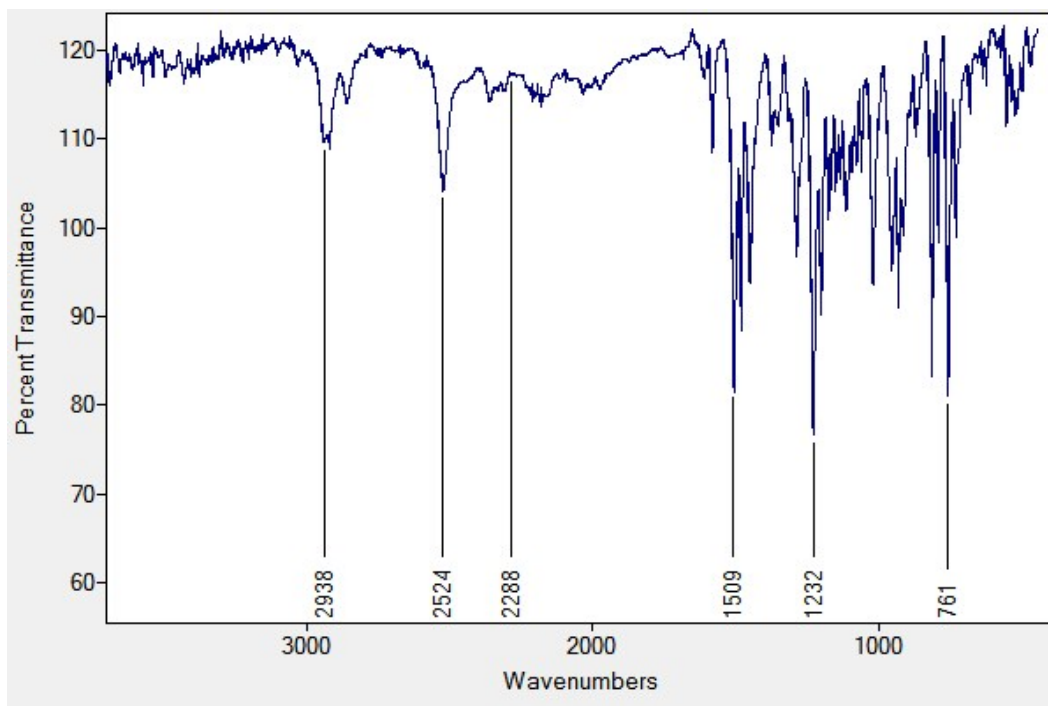

### Compound 4b

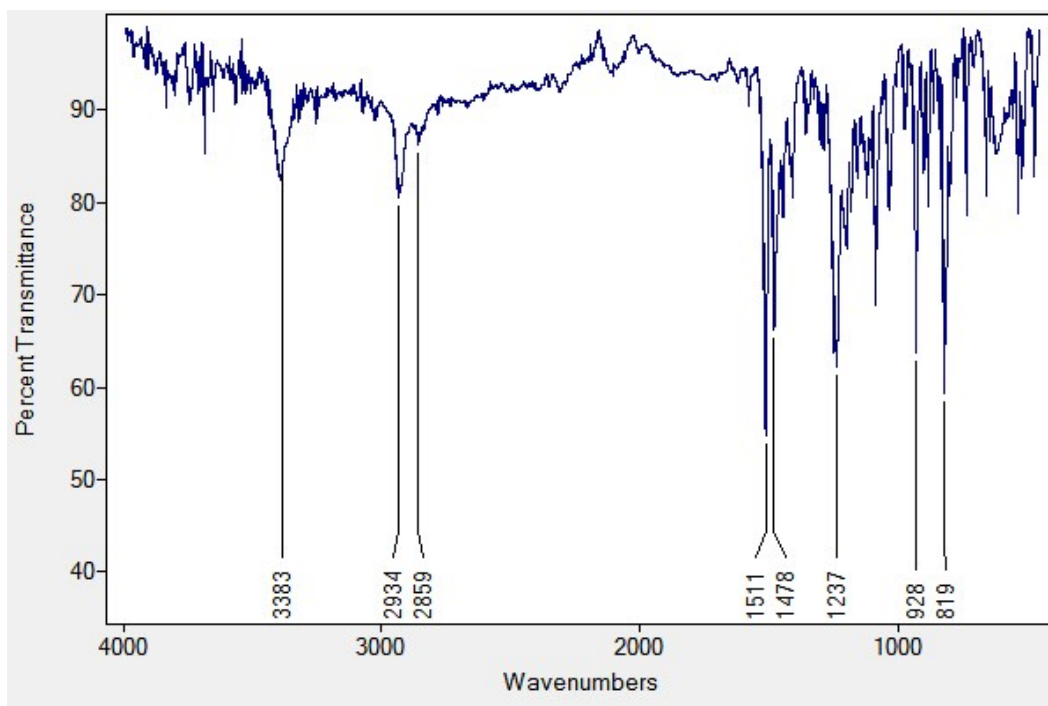

### Compound 4c

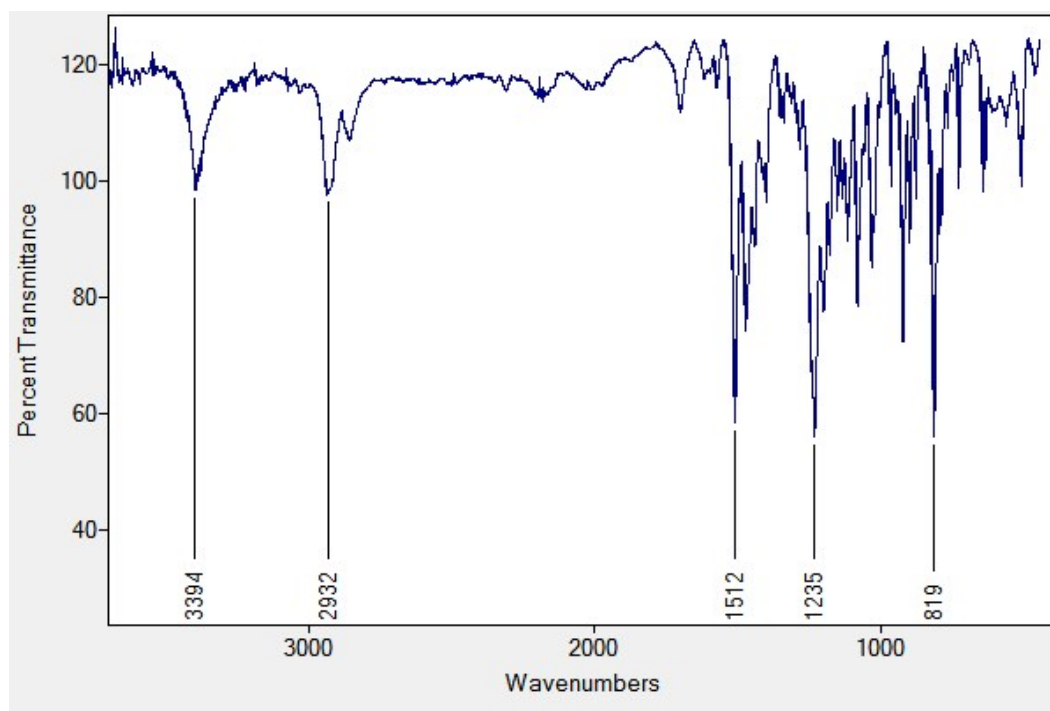

### Compound 4d

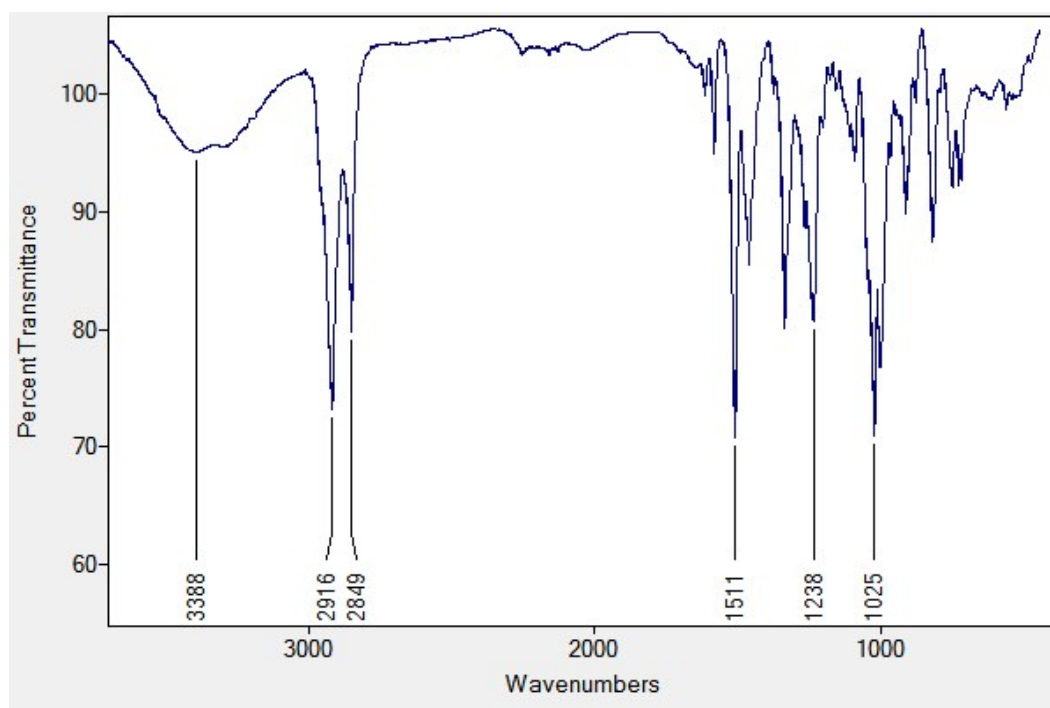

### Compound 4e

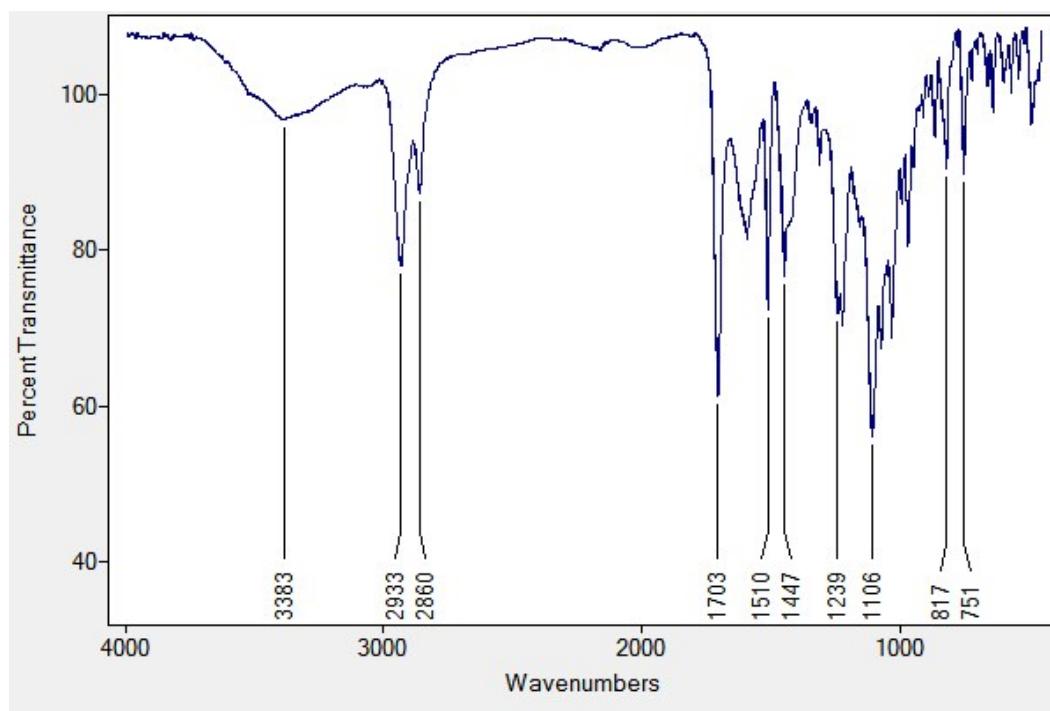

### Compound 4f

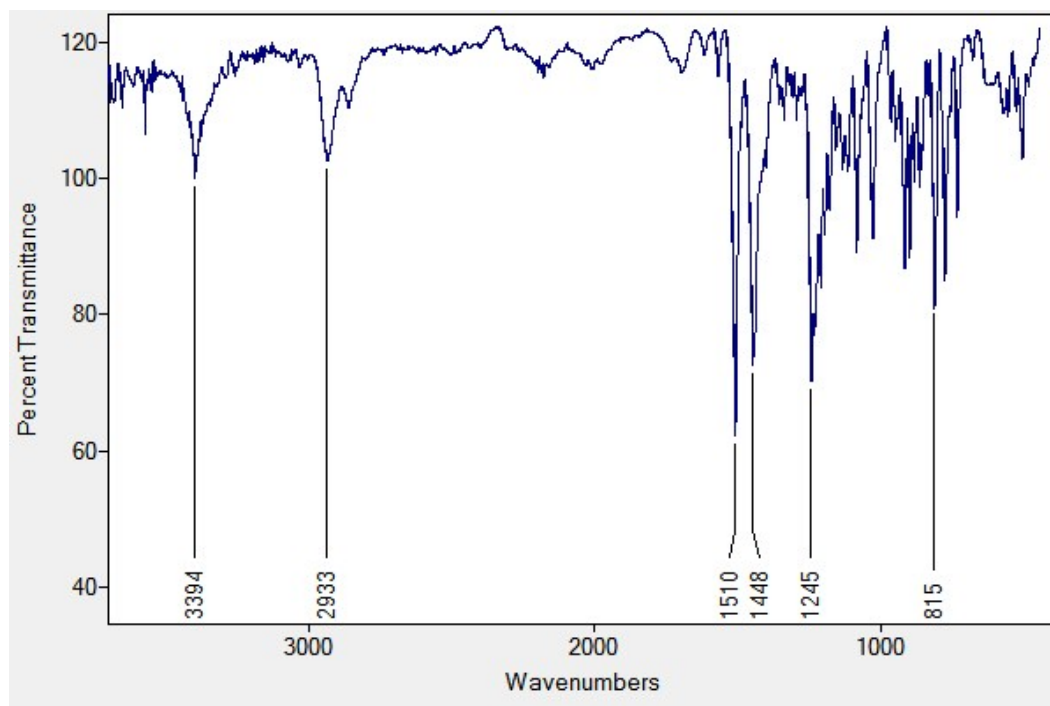

**Compound 4g**

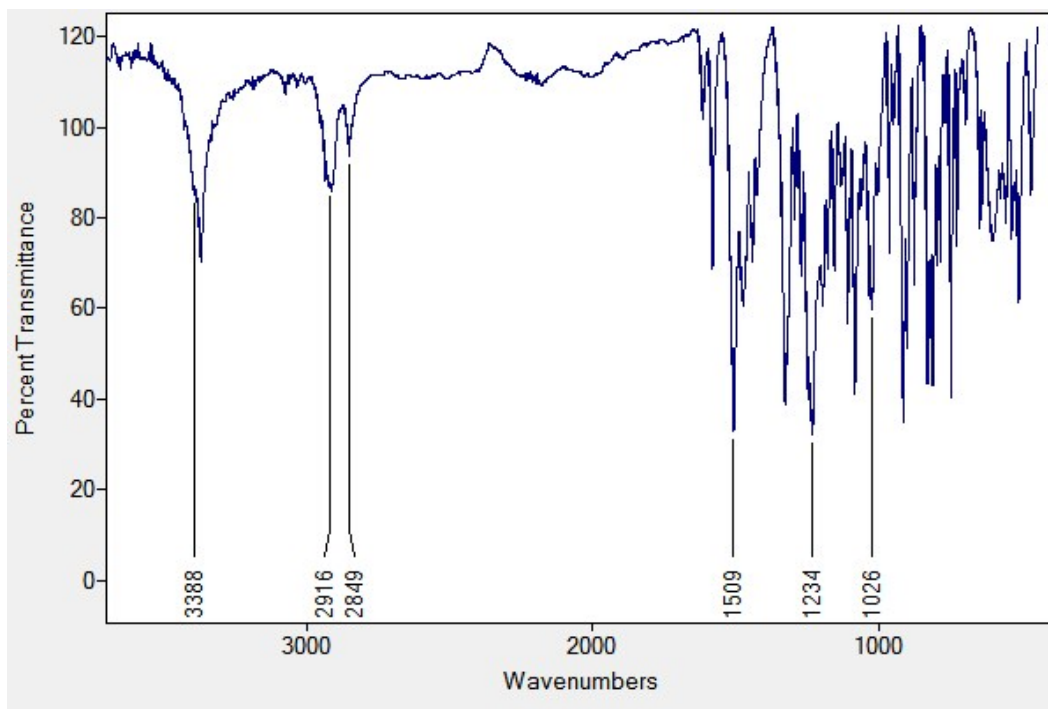

**Compound 4h**

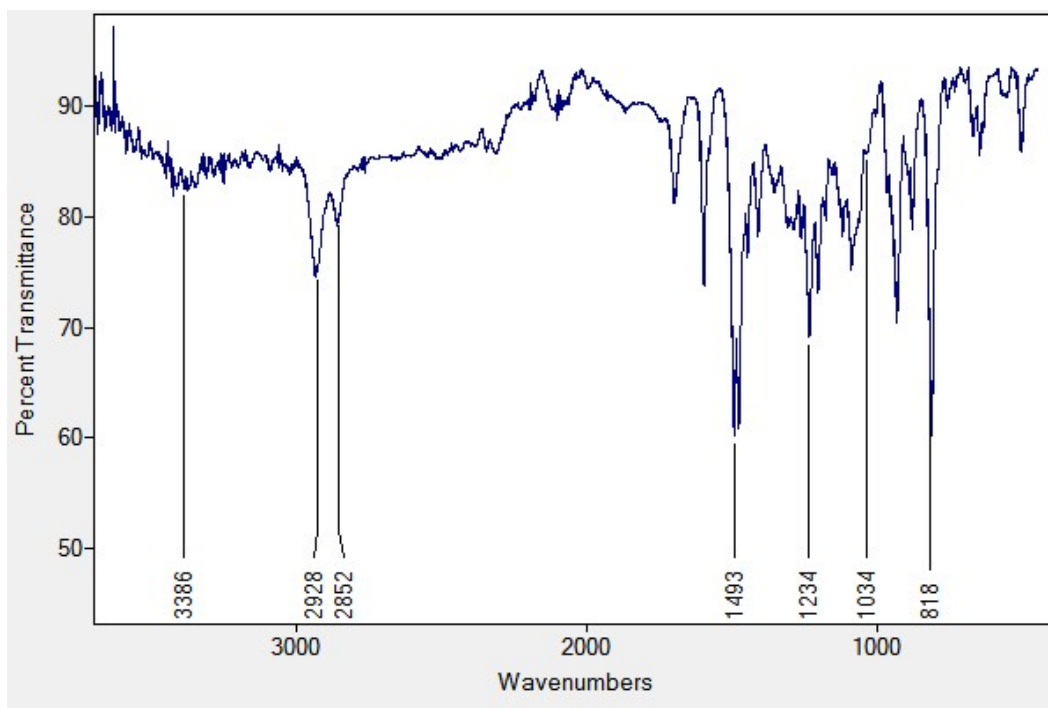

**Compound 4i**

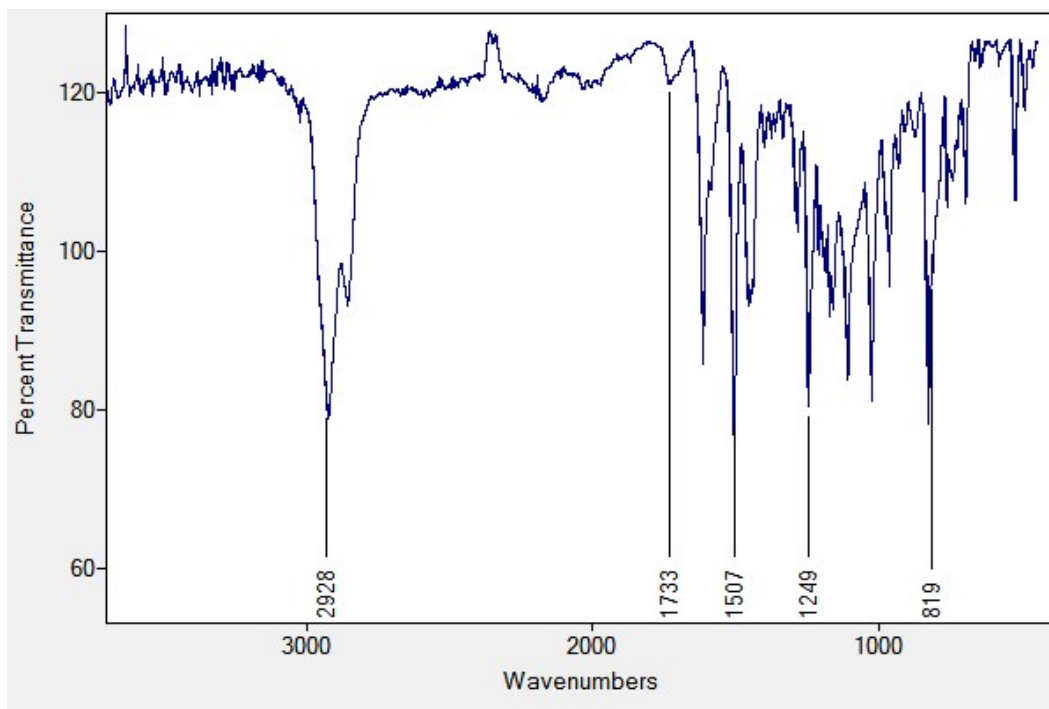

**Compound 4j**

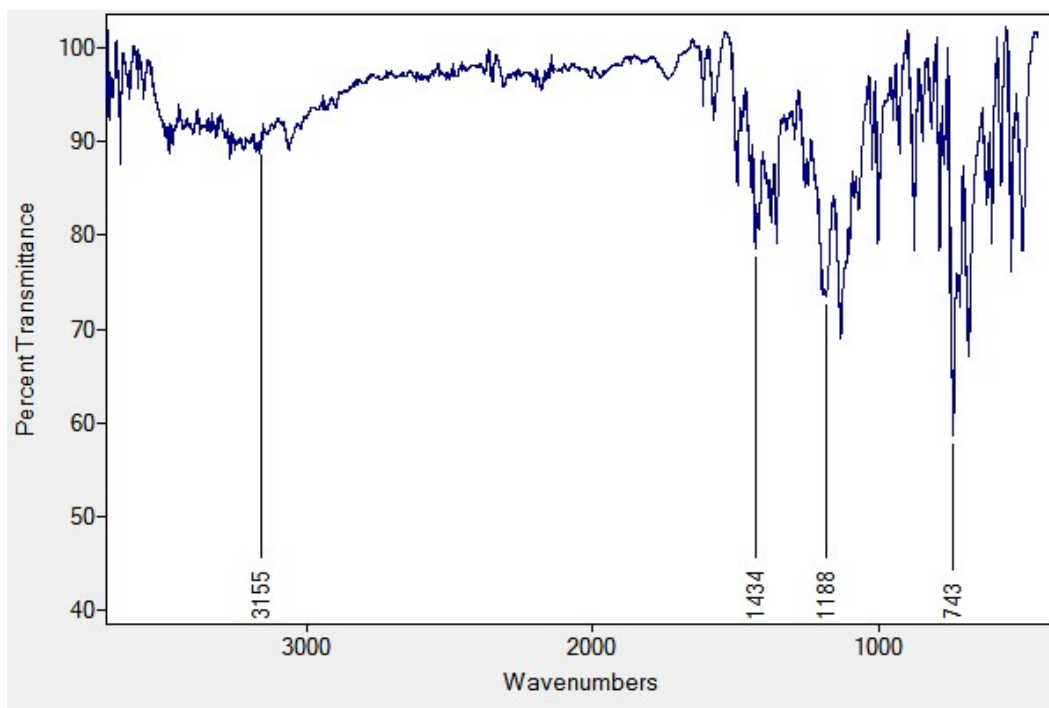

### Compound 4k

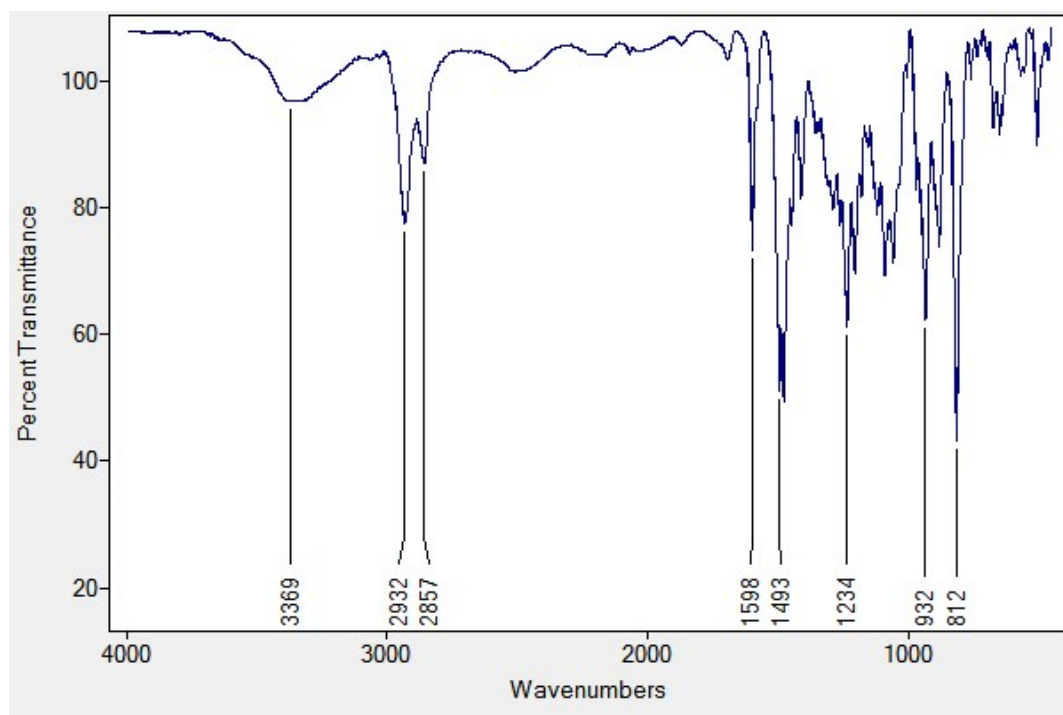

### Compound 4l

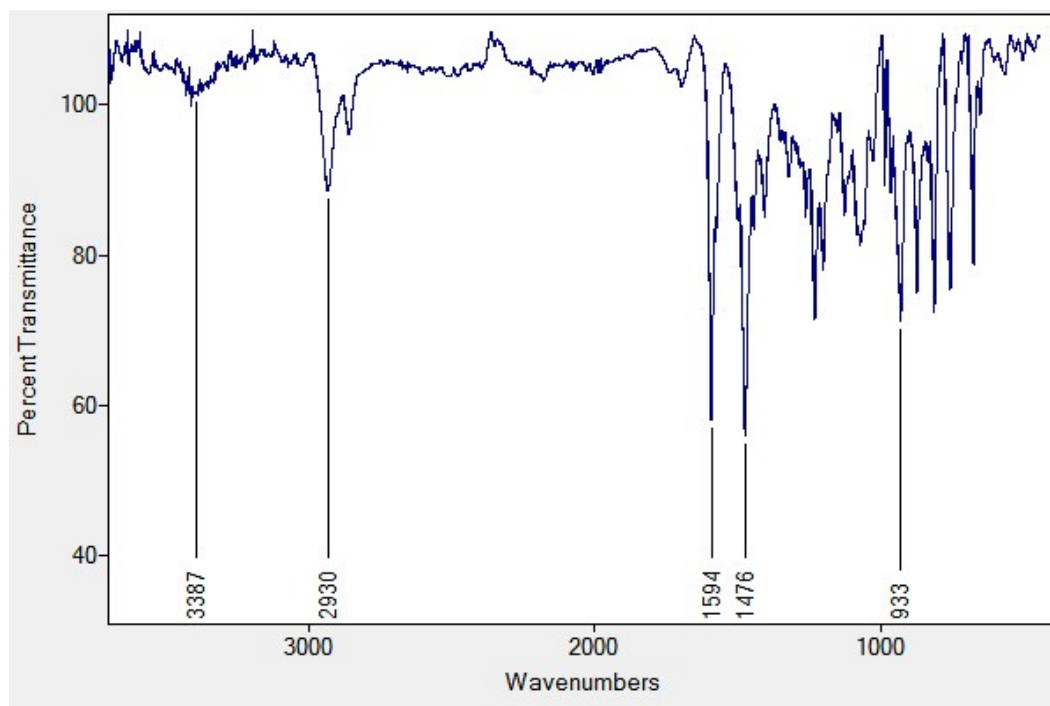

**Compound 4m**

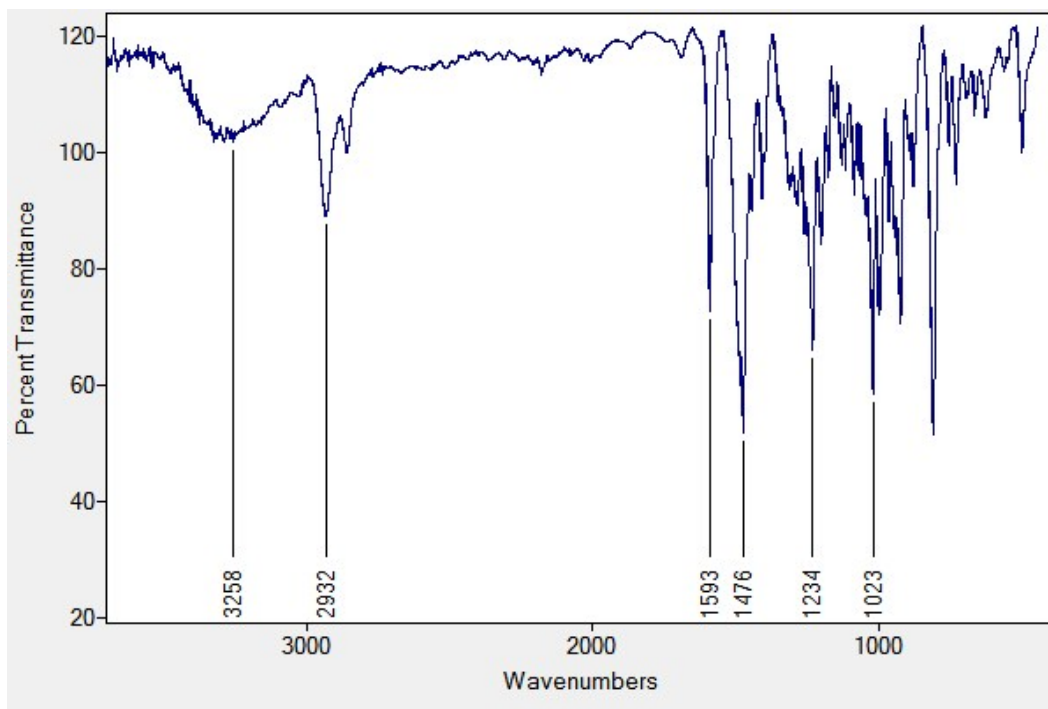

**Compound 4o**

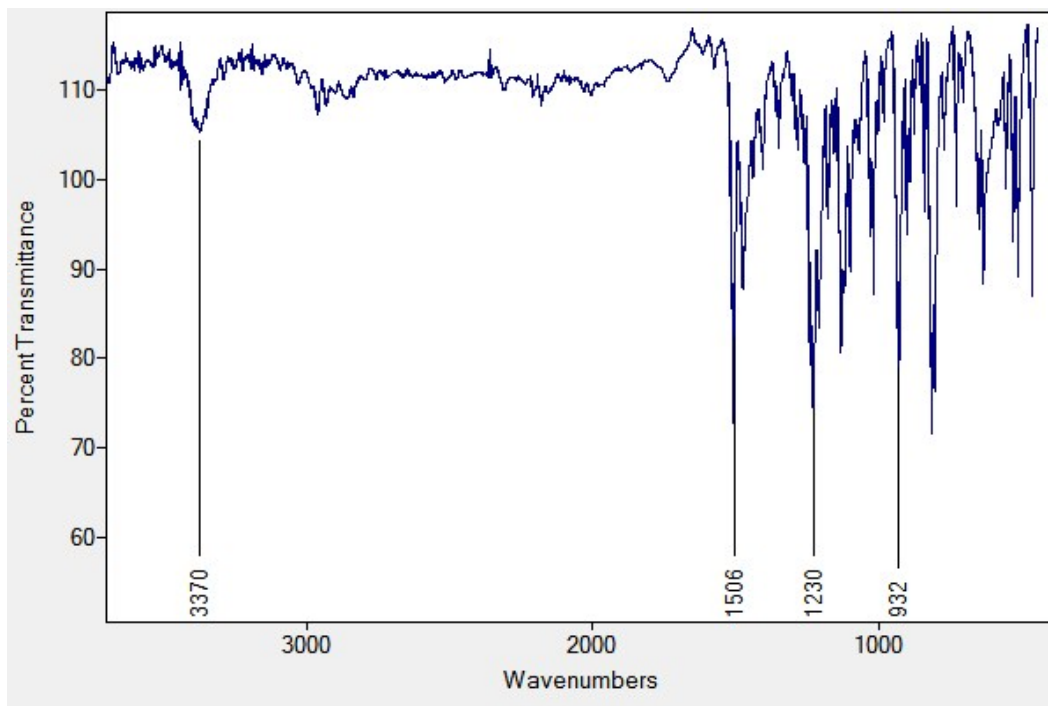



### Compound 4p

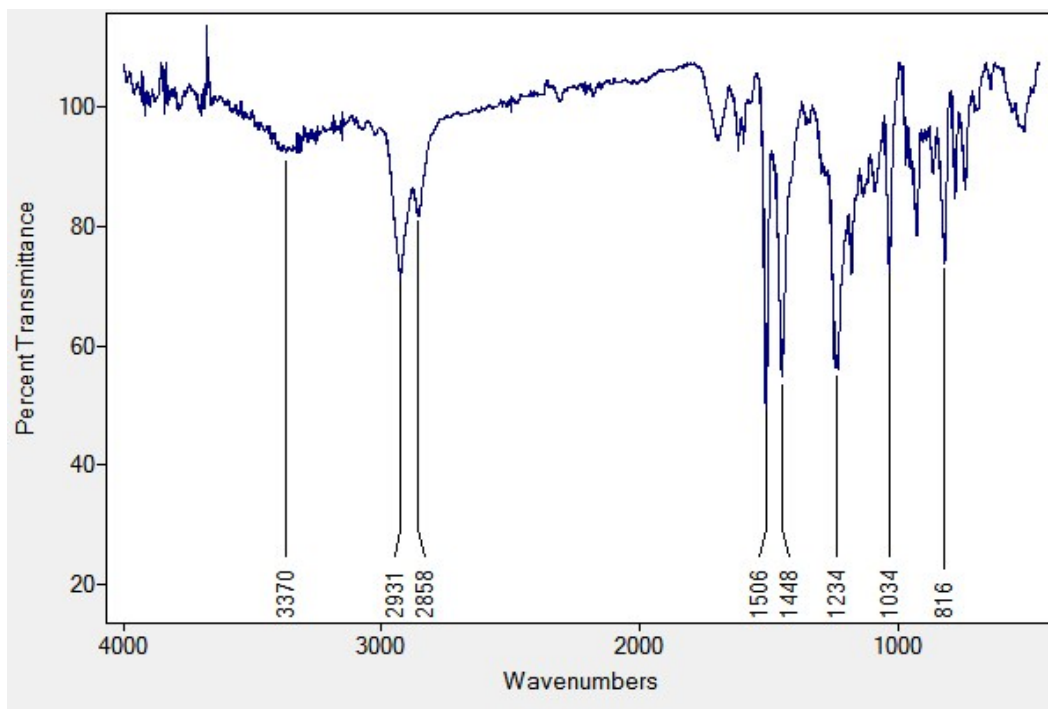

### Compound 4q

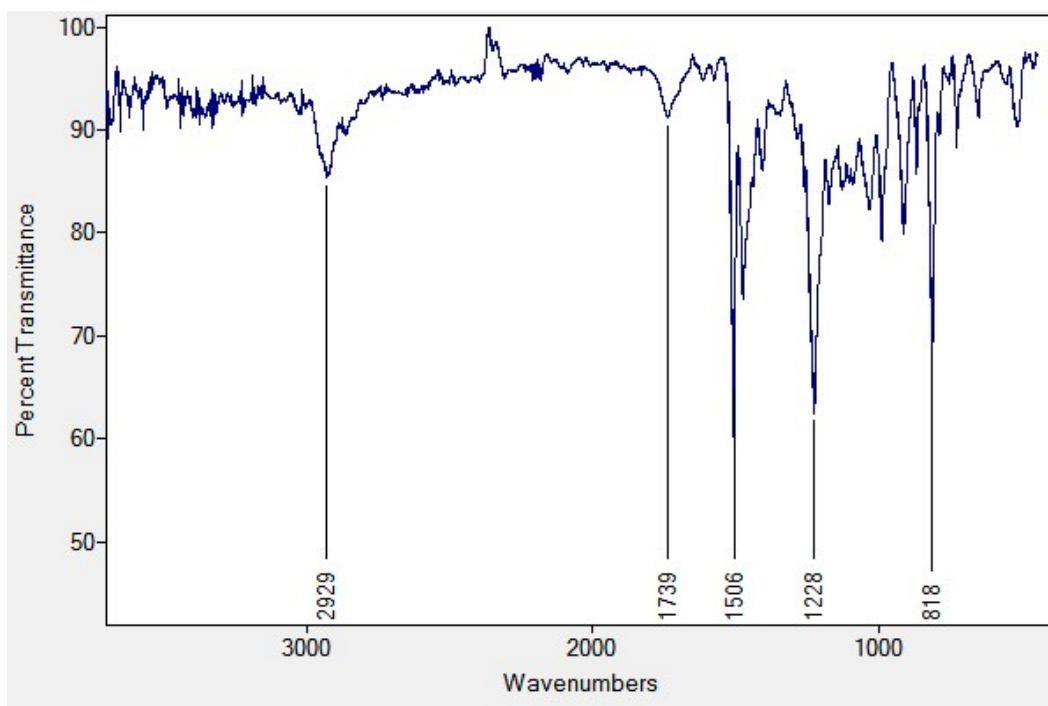

**Compound 4r**

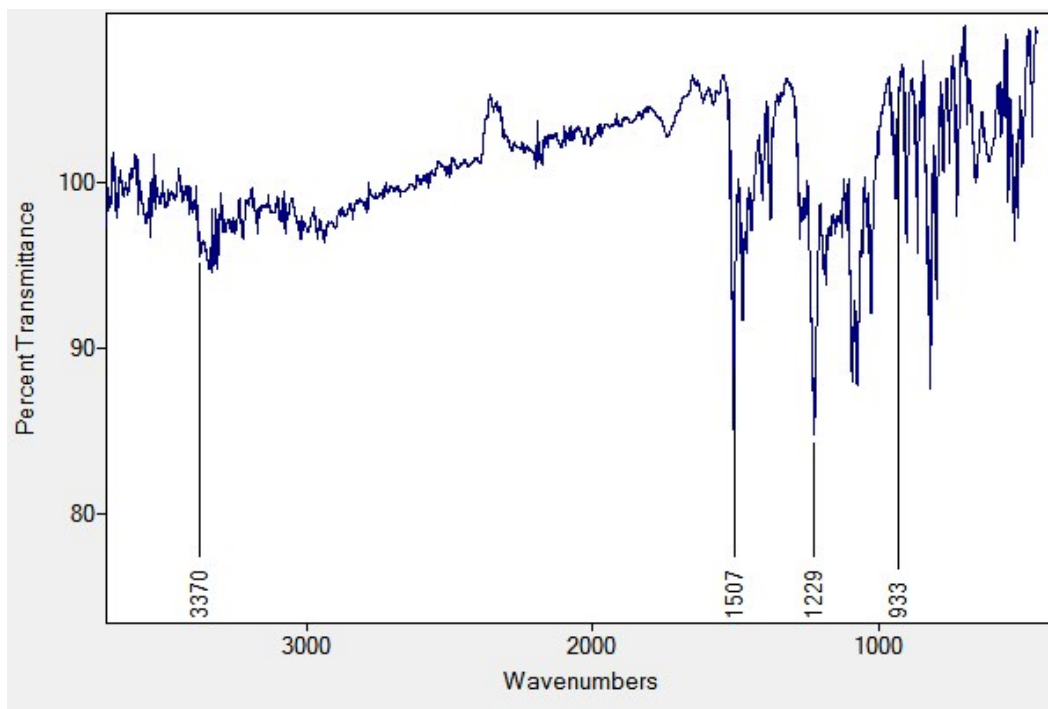

**Compound 4s**

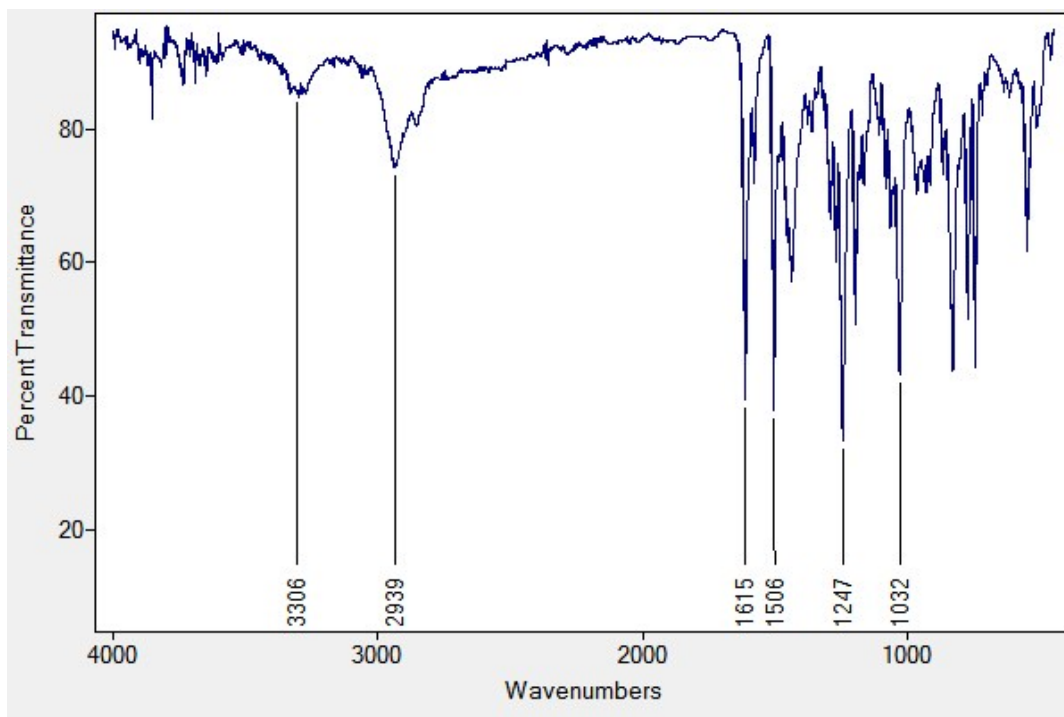

Supplement: c7ob00753a1.pdf [file c7ob00753a1.pdf]
